# Supplementary material for: Immunogenicity of biologics in inflammatory bowel disease
Source: PubMed Central journal article supplement — Ther Adv Gastroenterol. 2018 Jan 21;11:1756283X17750355. doi: 10.1177/1756283X17750355 (PMC5784568; doi:10.1177/1756283x17750355), 2018-01-21
Supplement: Supplementary_Material.pdf [file Supplementary_Material.pdf]

## Supplemental Digital Content

### Supplementary Table 1. Online search strategy.

Note that the inclusion of morbidities, in addition to ulcerative colitis and Crohn's disease, for which biologics are a treatment option, allowed this search to be run simultaneously for conditions of interest to the study sponsor in addition to inflammatory bowel disease (IBD).

Only publications related to IBD were considered for this review.

#### (a) MEDLINE® In-Process & Other Non-Indexed Citations

| S/N | Search terms                                                                                                                                                                                                                                  | Parameter    |
|-----|-----------------------------------------------------------------------------------------------------------------------------------------------------------------------------------------------------------------------------------------------|--------------|
| 1   | exp Arthritis: Rheumatoid/ or exp Arthritis: Psoriatic/ or exp Spondylarthritis/ or exp Spondylitis: Ankylosing/ or exp Spondylarthropathies/ or exp Colitis: Ulcerative/ or exp Crohn Disease/ or exp Psoriasis/ or exp Arthritis: Juvenile/ | Disease      |
| 2   | rheumatoid arthritis.tw.                                                                                                                                                                                                                      |              |
| 3   | (psoria\$ adj2 (arthrit\$ or arthropath\$)).tw.                                                                                                                                                                                               |              |
| 4   | (spondyloarthritis or spondyloarthritis or spondyloarthropathies).tw.                                                                                                                                                                         |              |
| 5   | (Axial SpA or axial spondyloarthritis or axSpA or ax-SpA).tw.                                                                                                                                                                                 |              |
| 6   | (ankylosing spondylitis or 'AS').tw.                                                                                                                                                                                                          |              |
| 7   | (bekhterev or bechterew or marie strumpell or rheumatoid spondylitis or ankylos* or spondyl* or axial).tw.                                                                                                                                    |              |
| 8   | (Non\$radiographic or radiograph* or nr-axSpA).tw.                                                                                                                                                                                            |              |
| 9   | Ulcerative colitis.tw.                                                                                                                                                                                                                        |              |
| 10  | crohn\$.tw.                                                                                                                                                                                                                                   |              |
| 11  | psoria\$.tw.                                                                                                                                                                                                                                  |              |
| 12  | ((Juvenile adj2 arthritis) or JIA or JRA).tw.                                                                                                                                                                                                 |              |
| 13  | or/1-12                                                                                                                                                                                                                                       |              |
| 14  | (Infliximab or Remicade or Avakine).mp.                                                                                                                                                                                                       | Intervention |
| 15  | (golimumab or CNTO 148 or CNTO148 or Simponi).mp.                                                                                                                                                                                             |              |
| 16  | (certolizumab or CDP870 or CDP 870 or PHA738144 or PHA 738144 or Cimzia).mp.                                                                                                                                                                  |              |
| 17  | (certolizumab adj2 pegol).mp.                                                                                                                                                                                                                 |              |

| S/N | Search terms                                                                                                                                                                                                                                                                   | Parameter    |
|-----|--------------------------------------------------------------------------------------------------------------------------------------------------------------------------------------------------------------------------------------------------------------------------------|--------------|
| 18  | (Etanercept or Enbrel or ETA or ETN).mp.                                                                                                                                                                                                                                       |              |
| 19  | (Tocilizumab or actemra or atlizumab).mp.                                                                                                                                                                                                                                      |              |
| 20  | (Rituximab or rituxan or Mabthera).mp.                                                                                                                                                                                                                                         |              |
| 21  | (Ustekinumab or stelara or CNTO 1275 or CNTO-1275).mp.                                                                                                                                                                                                                         |              |
| 22  | (Abatacept or BMS 188667 or ctla4 ig).mp.                                                                                                                                                                                                                                      |              |
| 23  | (Secukinumab or cosentyx or AIN457 or vedolizumab or entyvio).mp                                                                                                                                                                                                               |              |
| 24  | (biosimilars or biologics or CT-P13 or inflectra or remsima).mp.                                                                                                                                                                                                               |              |
| 25  | or/14-24                                                                                                                                                                                                                                                                       |              |
| 26  | randomized controlled trial.pt.                                                                                                                                                                                                                                                | Study Design |
| 27  | controlled clinical trial.pt.                                                                                                                                                                                                                                                  |              |
| 28  | randomi?ed.ab.                                                                                                                                                                                                                                                                 |              |
| 29  | placebo.tw.                                                                                                                                                                                                                                                                    |              |
| 30  | drug therapy.fs.                                                                                                                                                                                                                                                               |              |
| 31  | clinical trials as topic.sh.                                                                                                                                                                                                                                                   |              |
| 32  | randomly.ab.                                                                                                                                                                                                                                                                   |              |
| 33  | trial.ab.                                                                                                                                                                                                                                                                      |              |
| 34  | groups.ab.                                                                                                                                                                                                                                                                     |              |
| 35  | (crossover or cross-over or cross over).tw.                                                                                                                                                                                                                                    |              |
| 36  | ((singl\$ or double\$ or triple\$ or treble\$) and (blind\$ or mask\$)).tw:sh.                                                                                                                                                                                                 |              |
| 37  | Epidemiologic Studies/ or exp Case-Control Studies/ or exp Cohort Studies/ or exp Cross-Sectional Studies/ or exp Control Groups/ or Longitudinal Studies/ or Prospective Studies/ or Retrospective Studies/ or Comparative Study/ or research design/ or Observational Study/ |              |
| 38  | (case control or case-control).ti:ab.                                                                                                                                                                                                                                          |              |
| 39  | ((follow up or follow-up) adj (study or studies)).ti:ab.                                                                                                                                                                                                                       |              |
| 40  | (Longitudinal or retrospective or prospective or comparative or cohort or cross sectional or cross-sectional).ti:ab.                                                                                                                                                           |              |
| 41  | ((observ\$ or registry) adj3 (study or studies)).ti:ab.                                                                                                                                                                                                                        |              |
| 42  | (Epidemiolog\$ adj (study or studies or analysis)).ti:ab.                                                                                                                                                                                                                      |              |
| 43  | or/26-42                                                                                                                                                                                                                                                                       |              |
| 44  | exp "Costs and cost analysis"/ or cost-benefit analysis/                                                                                                                                                                                                                       |              |
| 45  | Economics: Pharmaceutical/ or Economics: Medical/ or Economics/ or exp Economics: Hospital/ or Economics: Dental/ or Economics: Nursing/                                                                                                                                       |              |
| 46  | (economic\$ or cost or costs or costly or costing or price or prices or pricing or pharmacoeconomic\$).ti:ab.                                                                                                                                                                  |              |
| 47  | (expenditure\$ not energy).ti:ab.                                                                                                                                                                                                                                              |              |
| 48  | (value adj1 money).ti:ab.                                                                                                                                                                                                                                                      |              |
| 49  | budget\$.ti:ab.                                                                                                                                                                                                                                                                |              |

| S/N | Search terms                                                                                                                                                                                                                                                                                                                                                                                                                                                                                                                                                            | Parameter         |
|-----|-------------------------------------------------------------------------------------------------------------------------------------------------------------------------------------------------------------------------------------------------------------------------------------------------------------------------------------------------------------------------------------------------------------------------------------------------------------------------------------------------------------------------------------------------------------------------|-------------------|
| 50  | or/44-49                                                                                                                                                                                                                                                                                                                                                                                                                                                                                                                                                                | Pharmacoeconomics |
| 51  | ((energy or oxygen) adj cost).ti:ab.                                                                                                                                                                                                                                                                                                                                                                                                                                                                                                                                    |                   |
| 52  | (metabolic adj cost).ti:ab.                                                                                                                                                                                                                                                                                                                                                                                                                                                                                                                                             |                   |
| 53  | ((energy or oxygen) adj expenditure).ti:ab.                                                                                                                                                                                                                                                                                                                                                                                                                                                                                                                             |                   |
| 54  | or/51-53                                                                                                                                                                                                                                                                                                                                                                                                                                                                                                                                                                |                   |
| 55  | 50 not 54                                                                                                                                                                                                                                                                                                                                                                                                                                                                                                                                                               |                   |
| 56  | Quality-Adjusted Life Years/                                                                                                                                                                                                                                                                                                                                                                                                                                                                                                                                            |                   |
| 57  | exp "Outcome and Process Assessment (Health Care)"/ or exp "Outcome Assessment (Health Care)"/ or exp Treatment Outcome/ or exp "Quality of Life"/                                                                                                                                                                                                                                                                                                                                                                                                                      |                   |
| 58  | ((sf or short form or shortform) and "6").tw.                                                                                                                                                                                                                                                                                                                                                                                                                                                                                                                           |                   |
| 59  | (EuroQol or standard gamble or time trade off or time tradeoff or TTO or EQ5D or EQ-5D or health utilit\$ index).tw.                                                                                                                                                                                                                                                                                                                                                                                                                                                    |                   |
| 60  | ((Health and utilit* and index) or HUI* or SF-6D or sf6* or sf 6* or short form 6* or shortform 6* or sf six or sfsix or short form six or shortform six or QALY or quality adjusted life year* or quality-adjusted life year or quality adjusted life-year* or quality-adjusted life-year* or SF-36 or sf36 or sf 36 or short form 36 or shortform 36 or sf thirtysix or sf thirty six or shortform thirtysix or shortform thirty six or short form thirtysix or short form thirty-six or short form thirty six or short form health survey or willingness to pay).tw. |                   |
| 61  | ((utilit* and score*) or (utilit* and weight*) or Rosser or (health and utilit*) or (utilit* and value) or disutility*).tw.                                                                                                                                                                                                                                                                                                                                                                                                                                             |                   |
| 62  | (outcome and measure\$).tw.                                                                                                                                                                                                                                                                                                                                                                                                                                                                                                                                             |                   |
| 63  | (health and outcome\$).tw.                                                                                                                                                                                                                                                                                                                                                                                                                                                                                                                                              |                   |
| 64  | or/56-63                                                                                                                                                                                                                                                                                                                                                                                                                                                                                                                                                                |                   |
| 65  | 43 or 55 or 64                                                                                                                                                                                                                                                                                                                                                                                                                                                                                                                                                          |                   |
| 66  | 13 and 25 and 65                                                                                                                                                                                                                                                                                                                                                                                                                                                                                                                                                        |                   |
| 67  | (editorial or comment\$ or letter or note or case series or case study or case studies or case report).pt. or (editorial/ or letter/ or case study/ or case report/ or note/)                                                                                                                                                                                                                                                                                                                                                                                           |                   |
| 68  | animal/ not (animal/ and human/)                                                                                                                                                                                                                                                                                                                                                                                                                                                                                                                                        |                   |
| 69  | or/67-68                                                                                                                                                                                                                                                                                                                                                                                                                                                                                                                                                                |                   |
| 70  | 66 not 69                                                                                                                                                                                                                                                                                                                                                                                                                                                                                                                                                               |                   |
| 71  | limit 70 to english language                                                                                                                                                                                                                                                                                                                                                                                                                                                                                                                                            |                   |
| 72  | <b>limit 71 to yr=2009 to present</b>                                                                                                                                                                                                                                                                                                                                                                                                                                                                                                                                   |                   |

(b) Embase®

| S/N | Search terms | Parameter |
|-----|--------------|-----------|
|-----|--------------|-----------|

| S/N | Search terms                                                                                                                                                                                                                                       | Parameter    |
|-----|----------------------------------------------------------------------------------------------------------------------------------------------------------------------------------------------------------------------------------------------------|--------------|
| 1   | exp rheumatoid arthritis/ or exp psoriatic arthritis/ or exp spondylarthritis/ or exp ankylosing spondylitis/ or exp spondyloarthropathy/ or exp ulcerative colitis/ or exp Crohn disease/ or exp Psoriasis/ or exp juvenile rheumatoid arthritis/ | Disease      |
| 2   | rheumatoid arthritis.tw.                                                                                                                                                                                                                           |              |
| 3   | (psoria\$ adj2 (arthrit\$ or arthropath\$)).tw.                                                                                                                                                                                                    |              |
| 4   | (spondyloarthritis or spondyloarthritides or spondyloarthropathies).tw.                                                                                                                                                                            |              |
| 5   | (Axial SpA or axial spondyloarthritis or axSpA or ax-SpA).tw.                                                                                                                                                                                      |              |
| 6   | (ankylosing spondylitis or 'AS').tw.                                                                                                                                                                                                               |              |
| 7   | (bekhterev or bechterew or marie strumpell or rheumatoid spondylitis or ankylos* or spondyl* or axial).tw.                                                                                                                                         |              |
| 8   | (Non\$radiographic or radiograph* or nr-axSpA).tw.                                                                                                                                                                                                 |              |
| 9   | Ulcerative colitis.tw.                                                                                                                                                                                                                             |              |
| 10  | crohn\$.tw.                                                                                                                                                                                                                                        |              |
| 11  | psoria\$.tw.                                                                                                                                                                                                                                       |              |
| 12  | ((Juvenile adj2 arthritis) or JIA or JRA).tw.                                                                                                                                                                                                      |              |
| 13  | or/1-12                                                                                                                                                                                                                                            |              |
| 14  | exp infliximab/ or exp adalimumab/ or exp golimumab/ or exp certolizumab pegol/ or exp etanercept/ or exp tocilizumab/ or exp rituximab/ or exp secukinumab/ or exp ustekinumab/ or exp abatacept/                                                 | Intervention |
| 15  | (Infliximab or Remicade or Avakine).mp.                                                                                                                                                                                                            |              |
| 16  | (Adalimumab or Humira or Hum?ra).mp.                                                                                                                                                                                                               |              |
| 17  | (golimumab or CNTO 148 or CNTO148 or Simponi).mp.                                                                                                                                                                                                  |              |
| 18  | (certolizumab or CDP870 or CDP 870 or PHA738144 or PHA 738144 or Cimzia).mp.                                                                                                                                                                       |              |
| 19  | (certolizumab adj2 pegol).mp.                                                                                                                                                                                                                      |              |
| 20  | (Etanercept or Enbrel or ETA or ETN).mp.                                                                                                                                                                                                           |              |
| 21  | (Tocilizumab or actemra or atlizumab).mp.                                                                                                                                                                                                          |              |
| 22  | (Rituximab or rituxan or Mabthera).mp.                                                                                                                                                                                                             |              |
| 23  | (Ustekinumab or stelara or CNTO 1275 or CNTO-1275).mp.                                                                                                                                                                                             |              |

| S/N | Search terms                                                                                                                                                                                                                                               | Parameter    |
|-----|------------------------------------------------------------------------------------------------------------------------------------------------------------------------------------------------------------------------------------------------------------|--------------|
| 24  | (Abatacept or orenicia or BMS 188667 or ctla4 ig).mp.                                                                                                                                                                                                      |              |
| 25  | (Secukinumab or cosentyx or AIN457 or vedolizumab or entyvio).mp                                                                                                                                                                                           |              |
| 26  | (biosimilars or biologics or CT-P13 or inflectra or remsima).mp.                                                                                                                                                                                           |              |
| 27  | or/14-26                                                                                                                                                                                                                                                   |              |
| 28  | clinical trial/                                                                                                                                                                                                                                            | Study Design |
| 29  | random\$.tw.                                                                                                                                                                                                                                               |              |
| 30  | randomized controlled trial/                                                                                                                                                                                                                               |              |
| 31  | trial\$.tw.                                                                                                                                                                                                                                                |              |
| 32  | controlled study/                                                                                                                                                                                                                                          |              |
| 33  | double blind procedure/                                                                                                                                                                                                                                    |              |
| 34  | placebo\$.tw.                                                                                                                                                                                                                                              |              |
| 35  | placebo/                                                                                                                                                                                                                                                   |              |
| 36  | (singl\$ adj (blind\$ or mask\$)).tw.                                                                                                                                                                                                                      |              |
| 37  | factorial\$.ti:ab.                                                                                                                                                                                                                                         |              |
| 38  | (crossover\$ or cross-over\$).ti:ab.                                                                                                                                                                                                                       |              |
| 39  | (double\$ adj (blind\$ or mask\$)).tw.                                                                                                                                                                                                                     |              |
| 40  | assign\$.ti:ab.                                                                                                                                                                                                                                            |              |
| 41  | allocat\$.ti:ab.                                                                                                                                                                                                                                           |              |
| 42  | volunteer\$.ti:ab.                                                                                                                                                                                                                                         |              |
| 43  | Crossover Procedure/                                                                                                                                                                                                                                       |              |
| 44  | Single Blind Procedure/                                                                                                                                                                                                                                    |              |
| 45  | ((triple\$ or treble\$) adj (blind\$ or mask\$)).tw.                                                                                                                                                                                                       |              |
| 46  | epidemiology/ or exp case control study/ or exp cohort analysis/ or exp cross-sectional study/ or exp control group/ or clinical study/ or longitudinal study/ or prospective study/ or retrospective study/ or comparative study/ or observational study/ |              |
| 47  | (Epidemiolog\$ adj (study or studies or analysis)).ti:ab.                                                                                                                                                                                                  |              |

| S/N | Search terms                                                                                                                                                                                                                                                                                                                                                                                                                                                                            | Parameter          |
|-----|-----------------------------------------------------------------------------------------------------------------------------------------------------------------------------------------------------------------------------------------------------------------------------------------------------------------------------------------------------------------------------------------------------------------------------------------------------------------------------------------|--------------------|
| 48  | (case control or case-control).ti:ab.                                                                                                                                                                                                                                                                                                                                                                                                                                                   |                    |
| 49  | ((follow up or follow-up) adj (study or studies)).ti:ab.                                                                                                                                                                                                                                                                                                                                                                                                                                |                    |
| 50  | (Longitudinal or retrospective or prospective or comparative or cohort or cross sectional or cross-sectional).ti:ab.                                                                                                                                                                                                                                                                                                                                                                    |                    |
| 51  | ((observ\$ or registry) adj3 (study or studies)).ti:ab.                                                                                                                                                                                                                                                                                                                                                                                                                                 |                    |
| 52  | or/28-51                                                                                                                                                                                                                                                                                                                                                                                                                                                                                |                    |
| 53  | health-economics/ or exp economic-evaluation/ or exp health-care-cost/ or exp pharmacoeconomics/                                                                                                                                                                                                                                                                                                                                                                                        |                    |
| 54  | (econom\$ or cost or costs or costly or costing or price or prices or pricing or pharmaco-economic\$).ti:ab.                                                                                                                                                                                                                                                                                                                                                                            |                    |
| 55  | (expenditure\$ not energy).ti:ab.                                                                                                                                                                                                                                                                                                                                                                                                                                                       |                    |
| 56  | (value adj2 money).ti:ab.                                                                                                                                                                                                                                                                                                                                                                                                                                                               |                    |
| 57  | budget\$.ti:ab.                                                                                                                                                                                                                                                                                                                                                                                                                                                                         |                    |
| 58  | or/53-57                                                                                                                                                                                                                                                                                                                                                                                                                                                                                |                    |
| 59  | (metabolic adj cost).ti:ab.                                                                                                                                                                                                                                                                                                                                                                                                                                                             |                    |
| 60  | ((energy or oxygen) adj cost).ti:ab.                                                                                                                                                                                                                                                                                                                                                                                                                                                    |                    |
| 61  | ((energy or oxygen) adj expenditure).ti:ab.                                                                                                                                                                                                                                                                                                                                                                                                                                             |                    |
| 62  | or/59-61                                                                                                                                                                                                                                                                                                                                                                                                                                                                                |                    |
| 63  | 58 not 62                                                                                                                                                                                                                                                                                                                                                                                                                                                                               |                    |
| 64  | exp quality adjusted life year/                                                                                                                                                                                                                                                                                                                                                                                                                                                         |                    |
| 65  | exp treatment outcome/                                                                                                                                                                                                                                                                                                                                                                                                                                                                  |                    |
| 66  | exp "quality of life"/                                                                                                                                                                                                                                                                                                                                                                                                                                                                  |                    |
| 67  | exp outcome assessment/                                                                                                                                                                                                                                                                                                                                                                                                                                                                 |                    |
| 68  | ((sf or short form or shortform) and "6").tw.                                                                                                                                                                                                                                                                                                                                                                                                                                           |                    |
| 69  | (EuroQol or standard gamble or time trade off or time tradeoff or TTO or EQ5D or EQ-5D or health utilit\$ index).tw.                                                                                                                                                                                                                                                                                                                                                                    | Pharmaco-economics |
| 70  | ((Health and utilit* and index) or HUI* or SF-6D or sf6* or sf 6* or short form 6* or shortform 6* or sf six or sfsix or short form six or shortform six or QALY or quality adjusted life year* or quality-adjusted life year or quality adjusted life-year* or quality-adjusted life-year* or SF-36 or sf36 or sf 36 or short form 36 or shortform 36 or sf thirtysix or sf thirty six or shortform thirtysix or shortform thirty six or short form thirtysix or short form thirty-six |                    |

| S/N | Search terms                                                                                                                                                                 | Parameter |
|-----|------------------------------------------------------------------------------------------------------------------------------------------------------------------------------|-----------|
|     | or short form thirty six or short form health survey or willingness to pay).tw.                                                                                              |           |
| 71  | ((utilit* and score*) or (utilit* and weight*) or Rosser or (health and utilit*) or (utilit* and value) or disutility*).tw.                                                  |           |
| 72  | or/64-71                                                                                                                                                                     |           |
| 73  | 52 or 63 or 72                                                                                                                                                               |           |
| 74  | 13 and 27 and 73                                                                                                                                                             |           |
| 75  | (editorial or comment* or letter or note or case series or case study or case studies or case report).pt. or (editorial/ or letter/ or case study/ or case report/ or note/) |           |
| 76  | animal/ not (animal/ and human/)                                                                                                                                             |           |
| 77  | or/75-76                                                                                                                                                                     |           |
| 78  | 74 not 77                                                                                                                                                                    |           |
| 79  | <b>limit 78 to (english language and yr=2009 to present</b>                                                                                                                  |           |

### (c) Cochrane Library

| S/N | Search terms                                                                                                    | Parameter |
|-----|-----------------------------------------------------------------------------------------------------------------|-----------|
| #1  | MeSH descriptor: [Arthritis: Rheumatoid] explode all trees                                                      | Disease   |
| #2  | MeSH descriptor: [Arthritis: Psoriatic] explode all trees                                                       |           |
| #3  | MeSH descriptor: [Spondylarthritis] explode all trees                                                           |           |
| #4  | MeSH descriptor: [Spondylitis: Ankylosing] explode all trees                                                    |           |
| #5  | MeSH descriptor: [Spondylarthropathies] explode all trees                                                       |           |
| #6  | MeSH descriptor: [Colitis: Ulcerative] explode all trees                                                        |           |
| #7  | MeSH descriptor: [Crohn Disease] explode all trees                                                              |           |
| #8  | MeSH descriptor: [Psoriasis] explode all trees                                                                  |           |
| #9  | MeSH descriptor: [Arthritis: Juvenile] explode all trees                                                        |           |
| #10 | (psoria* near/2 (arthrit* or arthropath*)):ti:ab:kw                                                             |           |
| #11 | rheumatoid arthritis:ti:ab:kw                                                                                   |           |
| #12 | (spondyloarthritis or spondyloarthritides or spondyloarthropathies):ti:ab:kw                                    |           |
| #13 | (Axial SpA or axial spondyloarthritis or axSpA or ax-SpA):ti:ab:kw                                              |           |
| #14 | (bekhterev or bechterew or marie strumpell or rheumatoid spondylitis or ankylos* or spondyl* or axial):ti:ab:kw |           |

|     |                                                                                                                                                                    |              |
|-----|--------------------------------------------------------------------------------------------------------------------------------------------------------------------|--------------|
| #15 | (Non*radiographic or radiograph* or nr-axSpA).ti:ab:kw.                                                                                                            |              |
| #16 | Ulcerative colitis:ti:ab:kw                                                                                                                                        |              |
| #17 | crohn*:ti:ab:kw                                                                                                                                                    |              |
| #18 | psoria*:ti:ab:kw                                                                                                                                                   |              |
| #19 | ((Juvenile near/2 arthritis) or JIA or JRA):ti:ab:kw                                                                                                               |              |
| #20 | #1 or #2 or #3 or #4 or #5 or #6 or #7 or #8 or #9 or #10 or #11 or #12 or #13 or #14 or #15 or #16 or #17 or #18 or #19                                           |              |
| #21 | (Infliximab or Remicade or Avakine):ti:ab:kw                                                                                                                       | Intervention |
| #22 | (golimumab or CNTO 148 or CNTO148 or Simponi):ti:ab:kw                                                                                                             |              |
| #23 | (certolizumab or CDP870 or CDP 870 or PHA738144 or PHA 738144 or Cimzia):ti:ab:kw                                                                                  |              |
| #24 | (certolizumab near/2 pegol):ti:ab:kw                                                                                                                               |              |
| #25 | (Etanercept or Enbrel or ETA or ETN):ti:ab:kw                                                                                                                      |              |
| #26 | (Tocilizumab or actemra or atlizumab):ti:ab:kw                                                                                                                     |              |
| #27 | (Rituximab or rituxan or Mabthera):ti:ab:kw                                                                                                                        |              |
| #28 | (Ustekinumab or stelara or CNTO 1275 or CNTO-1275):ti:ab:kw                                                                                                        |              |
| #29 | (Abatacept or orenicia or BMS 188667):ti:ab:kw                                                                                                                     |              |
| #30 | (Secukinumab or corsentyx or AIN457 or vedolizumab or entyvio):ti:ab:kw                                                                                            |              |
| #31 | (biosimilars or biologics):ti:ab:kw                                                                                                                                |              |
| #32 | #21 or #22 or #23 or #24 or #25 or #26 or #27 or #28 or #29 or #30 or #31                                                                                          |              |
| #33 | #20 and #32                                                                                                                                                        |              |
| #34 | <b>#33 Publication Year from 2009 to 2014: in Cochrane Reviews (Reviews and Protocols): Other Reviews: Trials: Technology Assessments and Economic Evaluations</b> |              |

(d) Cross-referencing of MEDLINE® In-Process & Other Non-Indexed Citations

| S/N | Search terms                                                                                                                                                                                                                                  | Parameter |
|-----|-----------------------------------------------------------------------------------------------------------------------------------------------------------------------------------------------------------------------------------------------|-----------|
| 1   | exp Arthritis: Rheumatoid/ or exp Arthritis: Psoriatic/ or exp Spondylarthritis/ or exp Spondylitis: Ankylosing/ or exp Spondylarthropathies/ or exp Colitis: Ulcerative/ or exp Crohn Disease/ or exp Psoriasis/ or exp Arthritis: Juvenile/ | Disease   |
| 2   | rheumatoid arthritis.tw.                                                                                                                                                                                                                      |           |
| 3   | (psoria\$ adj2 (arthrit\$ or arthropath\$)).tw.                                                                                                                                                                                               |           |
| 4   | (spondyloarthritis or spondyloarthritis\$ or spondyloarthropathies).tw.                                                                                                                                                                       |           |
| 5   | (Axial SpA or axial spondyloarthritis or axSpA or ax-SpA).tw.                                                                                                                                                                                 |           |



| <b>S/N</b> | <b>Search terms</b>                                                                                                                                                                                                                | <b>Parameter</b> |              |
|------------|------------------------------------------------------------------------------------------------------------------------------------------------------------------------------------------------------------------------------------|------------------|--------------|
| 6          | (ankylosing spondylitis or 'AS').tw.                                                                                                                                                                                               |                  |              |
| 7          | (bekhterev or bechterew or marie strumpell or rheumatoid spondylitis or ankylos* or spondyl* or axial).tw.                                                                                                                         |                  |              |
| 8          | (Non\$radiographic or radiograph* or nr-axSpA).tw.                                                                                                                                                                                 |                  |              |
| 9          | Ulcerative colitis.tw.                                                                                                                                                                                                             |                  |              |
| 10         | crohn\$.tw.                                                                                                                                                                                                                        |                  |              |
| 11         | psoria\$.tw.                                                                                                                                                                                                                       |                  |              |
| 12         | ((Juvenile adj2 arthritis) or JIA or JRA).tw.                                                                                                                                                                                      |                  |              |
| 13         | or/1-12                                                                                                                                                                                                                            |                  |              |
| 14         | (Infliximab or Remicade or Avakine).mp.                                                                                                                                                                                            |                  | Intervention |
| 15         | (Adalimumab or Humira or Hum?ra).mp.                                                                                                                                                                                               |                  |              |
| 16         | (golimumab or CNTO 148 or CNTO148 or Simponi).mp.                                                                                                                                                                                  |                  |              |
| 17         | (certolizumab or CDP870 or CDP 870 or PHA738144 or PHA 738144 or Cimzia).mp.                                                                                                                                                       |                  |              |
| 18         | (certolizumab adj2 pegol).mp.                                                                                                                                                                                                      |                  |              |
| 19         | (Etanercept or Enbrel or ETA or ETN).mp.                                                                                                                                                                                           |                  |              |
| 20         | (Tocilizumab or actemra or atlizumab).mp.                                                                                                                                                                                          |                  |              |
| 21         | (Rituximab or rituxan or Mabthera).mp.                                                                                                                                                                                             |                  |              |
| 22         | (Ustekinumab or stelara or CNTO 1275 or CNTO-1275).mp.                                                                                                                                                                             |                  |              |
| 23         | (Abatacept or BMS 188667 or ctla4 ig).mp.                                                                                                                                                                                          |                  |              |
| 24         | (Secukinumab or cosentyx or AIN457 or vedolizumab or entyvio).mp                                                                                                                                                                   |                  |              |
| 25         | (biosimilars or biologics or CT-P13 or inflectra or remsima).mp.                                                                                                                                                                   |                  |              |
| 26         | or/14-25                                                                                                                                                                                                                           |                  |              |
| 27         | randomized controlled trial.pt.                                                                                                                                                                                                    | Study Design     |              |
| 28         | controlled clinical trial.pt.                                                                                                                                                                                                      |                  |              |
| 29         | randomi?ed.ab.                                                                                                                                                                                                                     |                  |              |
| 30         | placebo.tw.                                                                                                                                                                                                                        |                  |              |
| 31         | drug therapy.fs.                                                                                                                                                                                                                   |                  |              |
| 32         | clinical trials as topic.sh.                                                                                                                                                                                                       |                  |              |
| 33         | randomly.ab.                                                                                                                                                                                                                       |                  |              |
| 34         | trial.ab.                                                                                                                                                                                                                          |                  |              |
| 35         | groups.ab.                                                                                                                                                                                                                         |                  |              |
| 36         | (crossover or cross-over or cross over).tw.                                                                                                                                                                                        |                  |              |
| 37         | ((singl\$ or double\$ or triple\$ or treble\$) and (blind\$ or mask\$)).tw:sh.                                                                                                                                                     |                  |              |
| 38         | Epidemiologic Studies/ or exp Case-Control Studies/ or exp Cohort Studies/ or exp Cross-Sectional Studies/ or exp Control Groups/ or Longitudinal Studies/ or Prospective Studies/ or Retrospective Studies/ or Comparative Study/ |                  |              |

| <b>S/N</b> | <b>Search terms</b>                                                                                                  | <b>Parameter</b>     |
|------------|----------------------------------------------------------------------------------------------------------------------|----------------------|
|            | or research design/ or Observational Study/                                                                          |                      |
| 39         | (case control or case-control).ti:ab.                                                                                |                      |
| 40         | ((follow up or follow-up) adj (study or studies)).ti:ab.                                                             |                      |
| 41         | (Longitudinal or retrospective or prospective or comparative or cohort or cross sectional or cross-sectional).ti:ab. |                      |
| 42         | ((observ\$ or registry) adj3 (study or studies)).ti:ab.                                                              |                      |
| 43         | (Epidemiolog\$ adj (study or studies or analysis)).ti:ab.                                                            |                      |
| 44         | or/27-43                                                                                                             |                      |
| 45         | immunogenicity.tw.                                                                                                   |                      |
| 46         | anti-drug antibod\$.tw.                                                                                              |                      |
| 47         | anti-infliximab antibod\$.tw.                                                                                        |                      |
| 48         | "antibod\$ to infliximab".tw.                                                                                        |                      |
| 49         | anti-ifx antibod\$.tw.                                                                                               |                      |
| 50         | anti-inf antibod\$.tw.                                                                                               |                      |
| 51         | anti-certolizumab pegol antibod\$.tw.                                                                                |                      |
| 52         | anti-certolizumab antibod\$.tw.                                                                                      |                      |
| 53         | "antibod\$ to certolizumab".tw.                                                                                      |                      |
| 54         | anti-czp antibod\$.tw.                                                                                               |                      |
| 55         | anti-abatacept antibod\$.tw.                                                                                         |                      |
| 56         | "antibod\$ to abatacept".tw.                                                                                         |                      |
| 57         | anti-CTLA4 antibod\$.tw.                                                                                             |                      |
| 58         | "antibod\$ to CTLA4".tw.                                                                                             | Immunogenicity Terms |
| 59         | anti-aba antibod\$.tw.                                                                                               |                      |
| 60         | anti-adalimumab antibod\$.tw.                                                                                        |                      |
| 61         | "antibod\$ to adalimumab".tw.                                                                                        |                      |
| 62         | anti-ada antibod\$.tw.                                                                                               |                      |
| 63         | anti-etanercept antibod\$.tw.                                                                                        |                      |
| 64         | "antibod\$ to etanercept".tw.                                                                                        |                      |
| 65         | anti-eta antibod\$.tw.                                                                                               |                      |
| 66         | anti-etn antibod\$.tw.                                                                                               |                      |
| 67         | anti-golimumab antibod\$.tw.                                                                                         |                      |
| 68         | "antibod\$ to golimumab".tw.                                                                                         |                      |
| 69         | anti-glm antibod\$.tw.                                                                                               |                      |
| 70         | anti-rituximab antibod\$.tw.                                                                                         |                      |
| 71         | antibod\$ to rituximab".tw.                                                                                          |                      |

| S/N | Search terms                                                                                                                                                                 | Parameter |
|-----|------------------------------------------------------------------------------------------------------------------------------------------------------------------------------|-----------|
| 72  | anti-rtx antibod\$.tw.                                                                                                                                                       |           |
| 73  | "anti-secukinumab antibod\$" or "anti-vedolizumab antibod\$".tw.                                                                                                             |           |
| 74  | "antibod\$ to secukinumab" or "antibod\$ to vedolizumab".tw.                                                                                                                 |           |
| 75  | "anti-sec antibod\$" or "anti-vdm antibod\$".tw.                                                                                                                             |           |
| 76  | anti-tocilizumab antibod\$.tw.                                                                                                                                               |           |
| 77  | "antibod\$ to tocilizumab".tw.                                                                                                                                               |           |
| 78  | anti-tcz antibod\$.tw.                                                                                                                                                       |           |
| 79  | anti-ustekinumab antibod\$.tw.                                                                                                                                               |           |
| 80  | "antibod\$ to ustekinumab".tw.                                                                                                                                               |           |
| 81  | anti-ust antibod\$.tw.                                                                                                                                                       |           |
| 82  | or/45-81                                                                                                                                                                     |           |
| 83  | 13 and 26 and 44 and 82                                                                                                                                                      |           |
| 84  | (editorial or comment* or letter or note or case series or case study or case studies or case report).pt. or (editorial/ or letter/ or case study/ or case report/ or note/) |           |
| 85  | animal/ not (animal/ and human/)                                                                                                                                             |           |
| 86  | or/84-85                                                                                                                                                                     |           |
| 87  | 83 not 86                                                                                                                                                                    |           |
| 88  | limit 87 to english language                                                                                                                                                 |           |
| 89  | <b>limit 88 to ed=2009 to present</b>                                                                                                                                        |           |

#### e) Cross-referencing Embase®

| S/N | Search terms                                                                                                                                                                                                                                       | Parameter |
|-----|----------------------------------------------------------------------------------------------------------------------------------------------------------------------------------------------------------------------------------------------------|-----------|
| 1   | exp rheumatoid arthritis/ or exp psoriatic arthritis/ or exp spondylarthritis/ or exp ankylosing spondylitis/ or exp spondyloarthropathy/ or exp ulcerative colitis/ or exp Crohn disease/ or exp Psoriasis/ or exp juvenile rheumatoid arthritis/ | Disease   |
| 2   | rheumatoid arthritis.tw.                                                                                                                                                                                                                           |           |
| 3   | (psoria\$ adj2 (arthrit\$ or arthropath\$)).tw.                                                                                                                                                                                                    |           |
| 4   | (spondyloarthritis or spondyloarthritides or spondyloarthropathies).tw.                                                                                                                                                                            |           |
| 5   | (Axial SpA or axial spondyloarthritis or axSpA or ax-SpA).tw.                                                                                                                                                                                      |           |

| S/N | Search terms                                                                                                                                                                   | Parameter    |              |
|-----|--------------------------------------------------------------------------------------------------------------------------------------------------------------------------------|--------------|--------------|
| 6   | (ankylosing spondylitis or 'AS').tw.                                                                                                                                           |              |              |
| 7   | (bekhterev or bechterew or marie strumpell or rheumatoid spondylitis or ankylos* or spondyl* or axial).tw.                                                                     |              |              |
| 8   | (Non\$radiographic or radiograph* or nr-axSpA).tw.                                                                                                                             |              |              |
| 9   | Ulcerative colitis.tw.                                                                                                                                                         |              |              |
| 10  | crohn\$.tw.                                                                                                                                                                    |              |              |
| 11  | psoria\$.tw.                                                                                                                                                                   |              |              |
| 12  | ((Juvenile adj2 arthritis) or JIA or JRA).tw.                                                                                                                                  |              |              |
| 13  | or/1-12                                                                                                                                                                        |              |              |
| 14  | exp infliximab/ or exp adalimumab/ or exp golimumab/ or exp certolizumab pegol/ or exp etanercept/ or exp tocilizumab/ or exp rituximab/ or exp ustekinumab/ or exp abatacept/ |              | Intervention |
| 15  | (Infliximab or Remicade or Avakine).mp.                                                                                                                                        |              |              |
| 16  | (Adalimumab or Humira or Hum?ra).mp.                                                                                                                                           |              |              |
| 17  | (golimumab or CNTO 148 or CNTO148 or Simponi).mp.                                                                                                                              |              |              |
| 18  | (certolizumab or CDP870 or CDP 870 or PHA738144 or PHA 738144 or Cimzia).mp.                                                                                                   |              |              |
| 19  | (certolizumab adj2 pegol).mp.                                                                                                                                                  |              |              |
| 20  | (Etanercept or Enbrel or ETA or ETN).mp.                                                                                                                                       |              |              |
| 21  | (Tocilizumab or actemra or atlizumab).mp.                                                                                                                                      |              |              |
| 22  | (Rituximab or rituxan or Mabthera).mp.                                                                                                                                         |              |              |
| 23  | (Ustekinumab or stelara or CNTO 1275 or CNTO-1275).mp.                                                                                                                         |              |              |
| 24  | (Abatacept or orenica or BMS 188667 or ctla4 ig).mp.                                                                                                                           |              |              |
| 25  | (Secukinumab or cosentyx or AIN457).mp                                                                                                                                         |              |              |
| 26  | (biosimilars or biologics or CT-P13 or inflectra or remsima).mp.                                                                                                               |              |              |
| 27  | or/14-26                                                                                                                                                                       |              |              |
| 28  | clinical trial/                                                                                                                                                                | Study Design |              |
| 29  | random\$.tw.                                                                                                                                                                   |              |              |
| 30  | randomized controlled trial/                                                                                                                                                   |              |              |

| S/N | Search terms                                                                                                                                                                                                                                               | Parameter |                          |
|-----|------------------------------------------------------------------------------------------------------------------------------------------------------------------------------------------------------------------------------------------------------------|-----------|--------------------------|
| 31  | trial\$.tw.                                                                                                                                                                                                                                                |           |                          |
| 32  | controlled study/                                                                                                                                                                                                                                          |           |                          |
| 33  | double blind procedure/                                                                                                                                                                                                                                    |           |                          |
| 34  | placebo\$.tw.                                                                                                                                                                                                                                              |           |                          |
| 35  | placebo/                                                                                                                                                                                                                                                   |           |                          |
| 36  | (singl\$ adj (blind\$ or mask\$)).tw.                                                                                                                                                                                                                      |           |                          |
| 37  | factorial\$.ti:ab.                                                                                                                                                                                                                                         |           |                          |
| 38  | (crossover\$ or cross-over\$).ti:ab.                                                                                                                                                                                                                       |           |                          |
| 39  | (double\$ adj (blind\$ or mask\$)).tw.                                                                                                                                                                                                                     |           |                          |
| 40  | assign\$.ti:ab.                                                                                                                                                                                                                                            |           |                          |
| 41  | allocat\$.ti:ab.                                                                                                                                                                                                                                           |           |                          |
| 42  | volunteer\$.ti:ab.                                                                                                                                                                                                                                         |           |                          |
| 43  | Crossover Procedure/                                                                                                                                                                                                                                       |           |                          |
| 44  | Single Blind Procedure/                                                                                                                                                                                                                                    |           |                          |
| 45  | ((triple\$ or treble\$) adj (blind\$ or mask\$)).tw.                                                                                                                                                                                                       |           |                          |
| 46  | epidemiology/ or exp case control study/ or exp cohort analysis/ or exp cross-sectional study/ or exp control group/ or clinical study/ or longitudinal study/ or prospective study/ or retrospective study/ or comparative study/ or observational study/ |           |                          |
| 47  | (Epidemiolog\$ adj (study or studies or analysis)).ti:ab.                                                                                                                                                                                                  |           |                          |
| 48  | (case control or case-control).ti:ab.                                                                                                                                                                                                                      |           |                          |
| 49  | ((follow up or follow-up) adj (study or studies)).ti:ab.                                                                                                                                                                                                   |           |                          |
| 50  | (Longitudinal or retrospective or prospective or comparative or cohort or cross sectional or cross-sectional).ti:ab.                                                                                                                                       |           |                          |
| 51  | ((observ\$ or registry) adj3 (study or studies)).ti:ab.                                                                                                                                                                                                    |           |                          |
| 52  | or/28-51                                                                                                                                                                                                                                                   |           |                          |
| 53  | immunogenicity.tw.                                                                                                                                                                                                                                         |           | Immunogenic<br>ity Terms |
| 54  | anti-drug antibod\$.tw.                                                                                                                                                                                                                                    |           |                          |

| S/N | Search terms                          | Parameter |
|-----|---------------------------------------|-----------|
| 55  | anti-infliximab antibod\$.tw.         |           |
| 56  | "antibod\$ to infliximab".tw.         |           |
| 57  | anti-ifx antibod\$.tw.                |           |
| 58  | anti-inf antibod\$.tw.                |           |
| 59  | anti-certolizumab pegol antibod\$.tw. |           |
| 60  | anti-certolizumab antibod\$.tw.       |           |
| 61  | "antibod\$ to certolizumab".tw.       |           |
| 62  | anti-czp antibod\$.tw.                |           |
| 63  | anti-abatacept antibod\$.tw.          |           |
| 64  | "antibod\$ to abatacept".tw.          |           |
| 65  | anti-CTLA4 antibod\$.tw.              |           |
| 66  | "antibod\$ to CTLA4".tw.              |           |
| 67  | anti-aba antibod\$.tw.                |           |
| 68  | anti-adalimumab antibod\$.tw.         |           |
| 69  | "antibod\$ to adalimumab".tw.         |           |
| 70  | anti-ada antibod\$.tw.                |           |
| 71  | anti-etanercept antibod\$.tw.         |           |
| 72  | "antibodies to etanercept".tw.        |           |
| 73  | anti-eta antibod\$.tw.                |           |
| 74  | anti-etn antibod\$.tw.                |           |
| 75  | anti-golimumab antibod\$.tw.          |           |
| 76  | "antibod\$ to golimumab".tw.          |           |
| 77  | anti-glm antibod\$.tw.                |           |
| 78  | anti-rituximab antibod\$.tw.          |           |
| 79  | "antibod\$ to rituximab".tw.          |           |

| S/N       | Search terms                                                                                                                                                                 | Parameter |
|-----------|------------------------------------------------------------------------------------------------------------------------------------------------------------------------------|-----------|
| 80        | anti-rtx antibod\$.tw.                                                                                                                                                       |           |
| 81        | “anti-secukinumab antibod\$” or “anti-vedolizumab antibod\$”.tw.                                                                                                             |           |
| 82        | "antibod\$ to secukinumab" or "antibod\$ to vedolizumab".tw.                                                                                                                 |           |
| 83        | “anti-sec antibod\$” or “anti-vdm antibod\$”.tw.                                                                                                                             |           |
| 84        | anti-tocilizumab antibod\$.tw.                                                                                                                                               |           |
| 85        | "antibod\$ to tocilizumab".tw.                                                                                                                                               |           |
| 86        | anti-tcz antibod\$.tw.                                                                                                                                                       |           |
| 87        | anti-ustekinumab antibod\$.tw.                                                                                                                                               |           |
| 88        | "antibod\$ to ustekinumab".tw.                                                                                                                                               |           |
| 89        | anti-ust antibod\$.tw.                                                                                                                                                       |           |
| 90        | or/53-90                                                                                                                                                                     |           |
| 91        | 13 and 27 and 52 and 90                                                                                                                                                      |           |
| 92        | (editorial or comment* or letter or note or case series or case study or case studies or case report).pt. or (editorial/ or letter/ or case study/ or case report/ or note/) |           |
| 93        | animal/ not (animal/ and human/)                                                                                                                                             |           |
| 94        | or/92-93                                                                                                                                                                     |           |
| 95        | 91 not 94                                                                                                                                                                    |           |
| 96        | limit 95 to english language                                                                                                                                                 |           |
| <b>97</b> | <b>limit 96 to em=2009 to present</b>                                                                                                                                        |           |

**Supplementary Table 2.** Conference proceedings search strategy.

|                        |                                                                                                                                                                                              |             |                          |
|------------------------|----------------------------------------------------------------------------------------------------------------------------------------------------------------------------------------------|-------------|--------------------------|
| <b>Conference:</b>     | <b>Advances in Inflammatory Bowel Disease Crohn's and Colitis</b>                                                                                                                            |             |                          |
| <b>Year:</b>           | 2013–2015                                                                                                                                                                                    |             |                          |
| <b>Search method:</b>  | Screening the title identified two potential relevant abstracts                                                                                                                              |             |                          |
| <b>Search results:</b> | Two abstracts identified                                                                                                                                                                     |             |                          |
| <b>Conference:</b>     | <b>Congress of the European Crohn's and Colitis Organisation (ECCO)</b>                                                                                                                      |             |                          |
| <b>Year:</b>           | 2013–2015                                                                                                                                                                                    |             |                          |
| <b>Search method:</b>  | Both oral and poster presentations were hand-searched from the conference website                                                                                                            |             |                          |
| <b>Search results:</b> | Forty-four abstracts identified                                                                                                                                                              |             |                          |
| <b>Conference:</b>     | <b>The International Society for Pharmacoeconomics and Outcomes Research (ISPOR)</b>                                                                                                         |             |                          |
| <b>Year:</b>           | 2009–2015                                                                                                                                                                                    |             |                          |
| <b>Search method:</b>  | The ISPOR scientific presentations database was searched with keywords listed in the table below. Thereafter: the titles and abstracts of the retrieved articles were screened for relevance |             |                          |
|                        | <b>Keyword</b>                                                                                                                                                                               | <b>Hits</b> | <b>Relevant abstract</b> |
|                        | Rheumatoid arthritis in title                                                                                                                                                                | 651         | 0                        |
|                        | Immunogenicity in abstract                                                                                                                                                                   | 15          | 0                        |
|                        | Anti-drug antibodies in abstract                                                                                                                                                             | 0           | 0                        |
|                        | Psoriatic arthritis in title                                                                                                                                                                 | 88          | 0                        |
|                        | Juvenile idiopathic arthritis in title                                                                                                                                                       | 14          | 0                        |
|                        | Ankylosing spondylitis in title                                                                                                                                                              | 78          | 0                        |
|                        | Psoriasis in title                                                                                                                                                                           | 279         | 0                        |
|                        | Crohn's disease in title                                                                                                                                                                     | 4           | 0                        |
|                        | Ulcerative colitis in title                                                                                                                                                                  | 52          | 0                        |
|                        | Non-radiographic axial spondyloarthritis in title                                                                                                                                            | 6           | 0                        |
| Antibodies in abstract | 92                                                                                                                                                                                           | 0           |                          |
| <b>Search results:</b> | No abstract was identified                                                                                                                                                                   |             |                          |



### Supplementary Table 3. Study data to extract.

| <b>Information to extract (comprehensive)</b> |                                                                                                                                                                                                                                                                                                                                                                                                              |
|-----------------------------------------------|--------------------------------------------------------------------------------------------------------------------------------------------------------------------------------------------------------------------------------------------------------------------------------------------------------------------------------------------------------------------------------------------------------------|
| Study information                             | <p>The following study information was extracted:</p> <ul style="list-style-type: none"><li>• Author</li><li>• Study name</li><li>• Study intervention</li><li>• Disease indication</li><li>• Study design</li><li>• Study duration</li><li>• Number of patients (per treatment arm)</li><li>• Study setting</li><li>• Study outcomes</li><li>• Country(ies)/centers</li><li>• Study limitation(s)</li></ul> |
| Treatment data                                | <p>The following information was extracted regarding biologic interventions:</p> <ul style="list-style-type: none"><li>• Dose</li><li>• Frequency</li><li>• Concomitant medication</li><li>• Route of administration</li></ul>                                                                                                                                                                               |

| <b>Information to extract (comprehensive)</b> |                                                                                                                                                                                                                                                                                                                                                                                                                                                                                                                                                                                                                                                                                                                                       |
|-----------------------------------------------|---------------------------------------------------------------------------------------------------------------------------------------------------------------------------------------------------------------------------------------------------------------------------------------------------------------------------------------------------------------------------------------------------------------------------------------------------------------------------------------------------------------------------------------------------------------------------------------------------------------------------------------------------------------------------------------------------------------------------------------|
| Baseline                                      | <p>The following baseline variables were extracted:</p> <ul style="list-style-type: none"> <li>• Age</li> <li>• Gender</li> <li>• Race</li> <li>• Disease duration</li> <li>• Proportion of patient with immunosuppressive therapy</li> <li>• Biologic experienced patients</li> <li>• CRP</li> <li>• ESR</li> <li>• IBDQ</li> <li>• PGA</li> <li>• Concomitant or prior IS</li> <li>• Prior biologics</li> </ul>                                                                                                                                                                                                                                                                                                                     |
| Safety outcomes                               | <p>The following safety outcomes were extracted:</p> <ul style="list-style-type: none"> <li>• Incidence of AEs due to dose intensification because of immunogenicity</li> <li>• Infusion/injection site reaction</li> <li>• Thromboembolic events and/or other types of AEs</li> </ul>                                                                                                                                                                                                                                                                                                                                                                                                                                                |
| Efficacy outcomes                             | <p>The following efficacy outcomes were extracted:</p> <ul style="list-style-type: none"> <li>• Proportion of patients with antibody presence/detection (based on type of method for detection e.g. ELISA vs. radioimmunoassay)</li> <li>• Proportion of refractory patients or patients who relapsed (number of patients who initially responded but lost response later)</li> <li>• Efficacy outcomes (CDAI: Mayo: etc.)</li> <li>• Duration of clinical response</li> <li>• Proportion of patients requiring dose intensification due to presence of ADAbs</li> <li>• Proportion of patient with relative gain in efficacy following dose intensification</li> <li>• Treatment discontinuations due to lack of efficacy</li> </ul> |
| Drug survival outcomes                        | <p>The following drug survival outcomes were extracted:</p> <ul style="list-style-type: none"> <li>• Treatment discontinuations due to any cause</li> </ul>                                                                                                                                                                                                                                                                                                                                                                                                                                                                                                                                                                           |

| <b>Information to extract (comprehensive)</b>    |                                                                                                                                                                                                                                      |
|--------------------------------------------------|--------------------------------------------------------------------------------------------------------------------------------------------------------------------------------------------------------------------------------------|
| Pharmacokinetic outcomes                         | <p>The following pharmacokinetic outcomes were extracted:</p> <ul style="list-style-type: none"> <li>• Biologic serum concentration</li> </ul>                                                                                       |
| Pharmacoeconomics and treatment-related outcomes | <p>The following pharmacoeconomic outcomes were extracted:</p> <ul style="list-style-type: none"> <li>• Costs associated with ADAbs management</li> <li>• ADAbs associated costs per patient</li> <li>• HRQoL (e.g. QALY)</li> </ul> |

ADAbs: anti-drug antibodies; AEs: adverse events; CDAI: Crohn's Disease Activity Index; CRP: C-reactive protein; ELISA: enzyme-linked immunosorbent assay; ESR: erythrocyte sedimentation rate; HRQoL: health-related quality of life; IBDQ: Inflammatory Bowel Disease Questionnaire; IS: immunosuppressant; PGA: physician's global assesment; QALY: quality-adjusted life years.

**Supplementary Table 4.** Characteristics of included studies.

| Author                                                      | Disease | Posology                                                                                               | Sample size | Study design             | Setting                   | Study duration | Study outcomes                                                       | Quality assessment score           |
|-------------------------------------------------------------|---------|--------------------------------------------------------------------------------------------------------|-------------|--------------------------|---------------------------|----------------|----------------------------------------------------------------------|------------------------------------|
| Eckert <i>et al.</i> : 2013 (CA)                            | CD      | ADA: sc 40/20 mg or 20/10 mg eow or qw                                                                 | 189         | RCT                      | NR                        | 52 weeks       | Pharmacokinetics & immunogenicity                                    | 9 <sup>a</sup>                     |
| Hanauer <i>et al.</i> : 2006                                | CD      | ADA: sc 40 mg w 0 and 20 mg w 2<br>ADA: sc 80 mg w 0 and 40 mg w 2<br>ADA: sc 160 mg w 0 and 80 mg w 2 | 299         | RCT                      | Multicenter               | 4 weeks        | Safety: efficacy: & immunogenicity                                   | 5 <sup>b</sup>                     |
| Hyams <i>et al.</i> : 2014 (CA)                             | CD      | ADA: sc 160/80 mg or 80/40 mg w 0: 2: and 40/20 mg or 20/10 mg eow                                     | 188         | RCT                      | NR                        | 52 weeks       | Safety: efficacy: & immunogenicity                                   | 8 <sup>a</sup>                     |
| Sandborn <i>et al.</i> : 2007a                              | CD      | ADA: sc 20: 40: 80: or 160 mg w 0 and 2: 40 mg qw or eow                                               | 276         | RCT                      | Multicenter International | 56 weeks       | Safety: CDAI remission: & immunogenicity                             | 4 <sup>b</sup>                     |
| Bodini <i>et al.</i> : 2014 (CA)                            | CD      | ADA: NR                                                                                                | 23          | Prospective cohort study | Single center             | 104 weeks      | Efficacy: pharmacokinetics: & immunogenicity                         | 7 <sup>a</sup>                     |
| Imaeda <i>et al.</i> : 2014                                 | CD      | ADA: sc 40 mg eow                                                                                      | 40          | Prospective cohort study | Single center             | NR             | Efficacy & immunogenicity                                            | 16 <sup>c</sup>                    |
| Karmiris <i>et al.</i> : 2009<br>Baert <i>et al.</i> : 2014 | CD      | ADA: sc 160/80 or 80/40 mg w 0 and 2 or 40 mg w 2 and 40 mg qw or eow                                  | 209         | Prospective cohort study | Single center             | NR             | Safety: efficacy: dose escalation: discontinuation: & immunogenicity | 18 <sup>c</sup><br>17 <sup>c</sup> |

| Author                                   | Disease         | Posology                                                      | Sample size | Study design               | Setting                   | Study duration | Study outcomes                                       | Quality assessment score |
|------------------------------------------|-----------------|---------------------------------------------------------------|-------------|----------------------------|---------------------------|----------------|------------------------------------------------------|--------------------------|
| Johnston <i>et al.</i> : 2015 (CA)       | CD              | ADA: NR                                                       | 90          | Prospective cohort study   | Multicenter               | NR             | Immunogenicity                                       | 5 <sup>a</sup>           |
| Ward <i>et al.</i> : 2015b (CA)          | CD              | ADA: NR                                                       | 80          | Prospective cohort study   | Multicenter               | NR             | Immunogenicity                                       | 6 <sup>a</sup>           |
| vande Casteele <i>et al.</i> : 2015 (CA) | CD              | ADA: sc: 160 mg w 0: 80 mg w 2: 40 mg every 4 wks             | 23          | Prospective cohort study   | Single center             | 12 weeks       | Safety: efficacy: & immunogenicity                   | 5 <sup>a</sup>           |
| Zittan <i>et al.</i> : 2015 (CA)         | CD              | ADA: NR                                                       | 91          | Prospective cohort study   | NR                        | NR             | Safety: efficacy: pharmacokinetics: & immunogenicity | 6 <sup>a</sup>           |
| West <i>et al.</i> : 2008                | CD              | ADA: sc 160 mg w 0: 80 mg w 2: and 40 mg eow                  | 30          | Retrospective cohort study | Multicenter               | NR             | Efficacy                                             | 16 <sup>c</sup>          |
| Awni <i>et al.</i> : 2013 (CA)           | UC              | ADA: sc 160 or 80 mg w 0: 2: and then 40 mg qw or eow         | 360         | RCT                        | NR                        | 52 weeks       | Pharmacokinetics & immunogenicity                    | 8 <sup>a</sup>           |
| Sandborn <i>et al.</i> : 2012b           | UC              | ADA: sc 160 mg w 0: 80 mg w 2: then 40 mg eow                 | 518         | RCT                        | Multicenter International | 52 weeks       | Safety: efficacy: pharmacokinetics: & immunogenicity | 3 <sup>b</sup>           |
| Suzuki <i>et al.</i> : 2014              | UC              | ADA: sc 160/80 mg or 80/40 mg w 0: 2 and 40 mg at wk then eow | 343         | RCT                        | Multicenter               | 52 weeks       | Safety & efficacy                                    | 4 <sup>b</sup>           |
| Ben-Bassat <i>et al.</i> : 2013a (CA)    | CD or UC cohort | ADA: sc 40 mg qw: 40 mg eow or 80 mg eow                      | 57          | Prospective cohort study   | NR                        | NR             | Safety: efficacy: & immunogenicity                   | 7 <sup>a</sup>           |

| <b>Author</b>                                                    | <b>Disease</b>  | <b>Posology</b>                                                                 | <b>Sample size</b>               | <b>Study design</b>      | <b>Setting</b>            | <b>Study duration</b> | <b>Study outcomes</b>                               | <b>Quality assessment score</b> |
|------------------------------------------------------------------|-----------------|---------------------------------------------------------------------------------|----------------------------------|--------------------------|---------------------------|-----------------------|-----------------------------------------------------|---------------------------------|
| Roblin <i>et al.</i> : 2014a                                     | CD or UC cohort | ADA: NR                                                                         | 40                               | Prospective cohort study | Single center             | NR                    | Efficacy: pharmacokinetics: & immunogenicity        | 17 <sup>c</sup>                 |
| Roblin <i>et al.</i> : 2014b                                     | CD or UC cohort | ADA: sc 40 mg eow: then INF 5 mg/kg w 0: 2: 6: and every 8 wks (non-responders) | 180                              | Prospective cohort study | Single center             | NR                    | Efficacy: pharmacokinetics: & immunogenicity        | 18 <sup>c</sup>                 |
| Steenholdt <i>et al.</i> : 2015 (CA)                             | CD or UC cohort | ADA: NR                                                                         | 72                               | Prospective cohort study | Single center             | NR                    | Efficacy and immunogenicity                         | 6 <sup>a</sup>                  |
| Velayos <i>et al.</i> : 2013 (CA)                                | CD or UC cohort | ADA: NR                                                                         | 54                               | Prospective cohort study | Single center             | NR                    | Efficacy: pharmacokinetics: & immunogenicity        | 1 <sup>a</sup>                  |
| Yarur <i>et al.</i> : 2013 (CA)                                  | CD or UC cohort | ADA: NR                                                                         | 66                               | Prospective cohort study | NR                        | NR                    | Pharmacokinetics & immunogenicity                   | 7 <sup>a</sup>                  |
| Sandborn <i>et al.</i> : 2011a                                   | CD              | CZP: sc 400 mg w 0: 2: and 4                                                    | 439                              | RCT                      | Multicenter International | 6 weeks               | CDAI responders & immunogenicity                    | 3 <sup>b</sup>                  |
| Schreiber <i>et al.</i> : 2005                                   | CD              | CZP: sc 100: 200 or 400 mg w 0: 4: and 8                                        | 372                              | RCT                      | Multicenter International | 12 weeks              | Safety: efficacy: & CDAI responders                 | 4 <sup>b</sup>                  |
| Schreiber <i>et al.</i> : 2007<br>Sandborn <i>et al.</i> : 2007b | CD              | CZP: sc 400 mg w 0: 2: 4: and every 4 wk                                        | PRECISE 1: 976<br>PRECISE 2: 930 | RCT                      | Multicenter International | 80 weeks              | Safety: efficacy: CDAI responders: & immunogenicity | 4 <sup>b</sup>                  |

| Author                                                              | Disease | Posology                                                                                                                     | Sample size                         | Study design | Setting                   | Study duration | Study outcomes                                      | Quality assessment score |
|---------------------------------------------------------------------|---------|------------------------------------------------------------------------------------------------------------------------------|-------------------------------------|--------------|---------------------------|----------------|-----------------------------------------------------|--------------------------|
| Lichtenstein <i>et al.</i> : 2010<br>Sandborn <i>et al.</i> : 2011b |         |                                                                                                                              |                                     |              |                           |                |                                                     |                          |
| Stefan <i>et al.</i> : 2014 (CA)                                    | CD      | CZP: sc 400 mg w 0: 2: 4: and every 4 wk                                                                                     | 594                                 | RCT & LTE    | Multicenter International | 364 weeks      | Safety & efficacy                                   | 4 <sup>b</sup>           |
| Sandborn <i>et al.</i> : 2014b                                      | UC      | GLM: sc 100/50 mg or 200/100 mg or 400/200 mg w 0 and 2                                                                      | 1064                                | RCT          | Multicenter International | 6 weeks        | Safety: efficacy: & immunogenicity                  | 3 <sup>b</sup>           |
| Sandborn <i>et al.</i> : 2014a                                      | UC      | RCT: GLM: sc 50 or 100 mg every 4 wks<br>nRCT: GLM: sc 100 mg every 4 wks                                                    | ALL: 1:228<br>RCT: 464<br>nRCT: 764 | RCT & nRCT   | Multicenter International | 54 weeks       | Safety: efficacy: & immunogenicity                  | 3 <sup>b</sup>           |
| Feagan <i>et al.</i> : 2014                                         | CD      | INF: i.v. 5 mg/kg w 1: 3: 7: 14: 22: 30: 38: and 46<br>INF plus MTX (10–25 mg/wk): 5 mg/kg w 1: 3: 7: 14: 22: 30: 38: and 46 | 132                                 | RCT          | Multicenter               | 50 weeks       | Safety: efficacy: & immunogenicity                  | 5 <sup>b</sup>           |
| Hanauer <i>et al.</i> : 2004                                        | CD      | INF: i.v. 5 mg/kg w 2 and 6 and every 8 wks<br>INF: i.v. 5 mg/kg w 2 and 6 and 10 mg/kg every 8 wks                          | 580                                 | RCT          | Multicenter International | 72 weeks       | Safety: efficacy: discontinuation: & immunogenicity | 4 <sup>b</sup>           |
| Hyams <i>et al.</i> : 2007                                          | CD      | INF: i.v. 5 mg/kg w 0: 2: 6: and every 8 or 12 wks from wk 14                                                                | 112                                 | RCT          | Multicenter International | 54 weeks       | Safety & immunogenicity                             | 3 <sup>b</sup>           |

| Author                                                                                                  | Disease | Posology                                                                                                                                                              | Sample size | Study design             | Setting                   | Study duration | Study outcomes                                       | Quality assessment score |
|---------------------------------------------------------------------------------------------------------|---------|-----------------------------------------------------------------------------------------------------------------------------------------------------------------------|-------------|--------------------------|---------------------------|----------------|------------------------------------------------------|--------------------------|
| Sands <i>et al.</i> : 2004                                                                              | CD      | INF: i.v. 5 mg/kg w 0: 2: 6: and every 8 wks                                                                                                                          | 306         | RCT                      | Multicenter International | 54 weeks       | Safety: efficacy: & immunogenicity                   | 3 <sup>b</sup>           |
| Steenholdt <i>et al.</i> : 2014a<br>Steenholdt <i>et al.</i> : 2013<br>Steenholdt <i>et al.</i> : 2014b | CD      | INF: i.v. 5 mg/kg every 4 wks: then ADA: sc 80 mg w 0 and then 40 mg eow                                                                                              | 69          | RCT                      | Multicenter               | 12 weeks       | Safety: efficacy: cost analysis: & immunogenicity    | 2 <sup>b</sup>           |
| van Assche <i>et al.</i> : 2008                                                                         | CD      | INF plus IS (continued IS (AZA: 2-2.5 mg/kg: 6-MP: 1-1.25 mg/kg: MTX: 15 mg/wk)): i.v. 5 mg/kg every 8 wks<br>INF plus IS (discontinued IS): i.v. 5 mg/kg every 8 wks | 80          | RCT                      | Multicenter               | 104 weeks      | Safety: efficacy: pharmacokinetics: & immunogenicity | 2 <sup>b</sup>           |
| Colombel <i>et al.</i> : 2010                                                                           | CD      | INF: i.v. 5- mg/kg w 0: 2: 6: and every 8 wks<br>INF plus AZA (2.5 mg/kg): i.v. 5- mg/kg w 0: 2: 6: and every 8 wks                                                   | 817         | RCT & LTE                | Multicenter               | 50 weeks       | Efficacy: CDAI remission: & immunogenicity           | 4 <sup>b</sup>           |
| Baert <i>et al.</i> : 2003<br>Magdelaine-Beuzelin <i>et al.</i> : 2009                                  | CD      | INF: i.v. 5 mg/kg w 0: 2: and 6                                                                                                                                       | 125         | Prospective cohort study | NR                        | NR             | Safety: pharmacokinetics: & immunogenicity           | 15 <sup>c</sup>          |



| Author                                | Disease | Posology                                                                                                                             | Sample size | Study design             | Setting       | Study duration | Study outcomes                                             | Quality assessment score |
|---------------------------------------|---------|--------------------------------------------------------------------------------------------------------------------------------------|-------------|--------------------------|---------------|----------------|------------------------------------------------------------|--------------------------|
| Ben-Bassat <i>et al.</i> : 2013b (CA) | CD      | INF: i.v. 5 mg/kg NR                                                                                                                 | 234         | Prospective cohort study | NR            | NR             | Efficacy: pharmacokinetics: & immunogenicity               | 6 <sup>a</sup>           |
| Echarri <i>et al.</i> : 2015 (CA)     | CD      | INF: NR                                                                                                                              | 36          | Prospective cohort study | NR            | NR             | Efficacy and immunogenicity                                | 6 <sup>a</sup>           |
| Farrell <i>et al.</i> : 2003          | CD      | INF: i.v. 5 mg/kg w 0: 2: and 6 and NR                                                                                               | 53          | Prospective cohort study | NR            | 16 weeks       | Safety: efficacy: & immunogenicity                         | 15 <sup>c</sup>          |
| Imaeda <i>et al.</i> : 2012           | CD      | INF: i.v. 5 mg/kg every 6-8 wks                                                                                                      | 58          | Prospective cohort study | Single center | NR             | Immunogenicity                                             | 16 <sup>c</sup>          |
| Lazebnik <i>et al.</i> : 2011 (CA)    | CD      | INF: i.v. 5 mg/kg w 0: 2: 6: and every 8 wks                                                                                         | 15          | Prospective cohort study | Single center | 52 weeks       | Efficacy & immunogenicity                                  | 9 <sup>a</sup>           |
| Levesque <i>et al.</i> : 2014         | CD      | INF: i.v. ≤5 mg/kg w 0 and 8                                                                                                         | 327         | Prospective cohort study | Multicenter   | 8 weeks        | Efficacy: pharmacokinetics: & immunogenicity               | 16 <sup>c</sup>          |
| Maser <i>et al.</i> : 2006            | CD      | INF: i.v. 5 mg/kg w 0: 2: 6: and every 6: 7: or 8 wks                                                                                | 105         | Prospective cohort study | Single center | NR             | Safety: efficacy: endoscopic improvement: & immunogenicity | 14 <sup>c</sup>          |
| Vermeire <i>et al.</i> : 2007         | CD      | INF: i.v. NR w 0 or w 0: 2: and 6<br>INF plus IS (AZA: 2–2.5 mg/kg; 6-MP: 1–1.25 mg/kg; MTX: 15 mg/wk): i.v. NR w 0 or w 0: 2: and 6 | 174         | Prospective cohort study | Multicenter   | NR             | Safety: efficacy: pharmacokinetics: & immunogenicity       | 15 <sup>c</sup>          |
| Stein <i>et al.</i> : 2014 (CA)       | CD      | INF: NR                                                                                                                              | 82          | Prospective cohort study | NR            | 52 weeks       | Safety & efficacy                                          | 7 <sup>a</sup>           |

| Author                                | Disease | Posology                                           | Sample size | Study design               | Setting                   | Study duration | Study outcomes                               | Quality assessment score |
|---------------------------------------|---------|----------------------------------------------------|-------------|----------------------------|---------------------------|----------------|----------------------------------------------|--------------------------|
| Hukkinen <i>et al.</i> : 2014         | CD      | INF: i.v.: 5 mg/kg; w 0: 2: 6: and the every 8 wks | 13          | Retrospective cohort study | NR                        | NR             | Safety & efficacy                            | 17 <sup>c</sup>          |
| Ainsworth <i>et al.</i> : 2008        | CD      | INF: NR                                            | 70          | Retrospective cohort study | Single center             | 8 weeks        | Efficacy: pharmacokinetics: & immunogenicity | 17 <sup>c</sup>          |
| Bortlik <i>et al.</i> : 2013          | CD      | INF: i.v. NR w 0: 2: 6: and every 8 wks            | 184         | Retrospective cohort study | Single center             | NR             | Efficacy: pharmacokinetics: & immunogenicity | 14 <sup>c</sup>          |
| Bar-yoseph <i>et al.</i> : 2015 (CA)  | CD      | INF: NR                                            | 136         | Retrospective cohort study | Multicenter               | 104 weeks      | Efficacy                                     | 5 <sup>a</sup>           |
| Drobne <i>et al.</i> : 2015           | CD      | INF: NR                                            | 533         | Retrospective cohort study | Single center             | NR             | Efficacy & immunogenicity                    | 14 <sup>c</sup>          |
| Church <i>et al.</i> : 2014           | CD      | INF: i.v. 5 mg/kg w 0: 2: 6: NR                    | 195         | Retrospective chart review | Single center             | NR             | Efficacy: drug survival: & immunogenicity    | 17 <sup>c</sup>          |
| Rutgeerts <i>et al.</i> : 2005 ACT I  | UC      | INF: i.v. 5 or 10 mg/kg w 0: 2: 6: and every 8 wks | 364         | RCT                        | Multicenter International | 54 weeks       | Safety: Mayo responders: & immunogenicity    | 4 <sup>b</sup>           |
| Rutgeerts <i>et al.</i> : 2005 ACT II | UC      | INF: i.v. 5 or 10 mg/kg w 0: 2: 6: and every 8 wks | 364         | RCT                        | Multicenter International | 30 weeks       | Safety: Mayo responders: & immunogenicity    | 4 <sup>b</sup>           |
| Brandse <i>et al.</i> : 2014 (CA)     | UC      | INF: i.v. 5 mg/kg w 0: 2: and 6                    | 15          | Prospective cohort study   | Multicenter               | 6 weeks        | Efficacy & pharmacokinetics                  | 5 <sup>a</sup>           |
| Brandse <i>et al.</i> : 2015a (CA)    | UC      | INF: NR                                            | 20          | Prospective cohort study   | NR                        | NR             | Immunogenicity                               | 8 <sup>a</sup>           |

| <b>Author</b>                             | <b>Disease</b>  | <b>Posology</b>                                                             | <b>Sample size</b> | <b>Study design</b>        | <b>Setting</b> | <b>Study duration</b> | <b>Study outcomes</b>                                   | <b>Quality assessment score</b> |
|-------------------------------------------|-----------------|-----------------------------------------------------------------------------|--------------------|----------------------------|----------------|-----------------------|---------------------------------------------------------|---------------------------------|
| Murthy <i>et al.</i> : 2012 (CA)          | UC              | INF: i.v. 5 mg/kg NR                                                        | 134                | Prospective cohort study   | NR             | NR                    | Efficacy: pharmacokinetics: & immunogenicity            | 4 <sup>a</sup>                  |
| Seow <i>et al.</i> : 2010                 | UC              | INF: i.v. 5 or 10 mg/kg w 0: 2: 6: and then every 6: 7: or 8 wks            | 115                | Prospective cohort study   | NR             | NR                    | Efficacy: endoscopic improvement: & mayo responders     | 18 <sup>c</sup>                 |
| Ungar <i>et al.</i> : 2015 (CA)           | UC              | INF: NR                                                                     | 28                 | Prospective cohort study   | NR             | NR                    | Immunogenicity                                          | 6 <sup>a</sup>                  |
| Hayes <i>et al.</i> : 2014                | UC              | INF: i.v. 5 mg/kg every 8 wks<br>INF plus IS (NR): i.v. 5 mg/kg every 8 wks | 85                 | Retrospective chart review | Single center  | NR                    | Safety: efficacy: concomitant therapy: & immunogenicity | 16 <sup>c</sup>                 |
| Vande Casteele <i>et al.</i> : 2012a (CA) | CD or UC cohort | INF: NR                                                                     | 270                | RCT                        | NR             | NR                    | Dose escalation                                         | 6 <sup>a</sup>                  |
| Cardile <i>et al.</i> : 2013 (CA)         | CD or UC cohort | INF: NR                                                                     | 15                 | Prospective cohort study   | NR             | NR                    | Immunogenicity & pharmacokinetics                       | 6 <sup>a</sup>                  |
| Daperno <i>et al.</i> : 2013 (CA)         | CD or UC cohort | INF: NR                                                                     | 71                 | Prospective cohort study   | NR             | NR                    | Pharmacokinetics & immunogenicity                       | 4 <sup>a</sup>                  |
| Eser <i>et al.</i> : 2013 (CA)            | CD or UC cohort | INF: NR                                                                     | 90                 | Prospective cohort study   | NR             | NR                    | Immunogenicity                                          | 6 <sup>a</sup>                  |

| Author                                  | Disease         | Posology                                     | Sample size | Study design             | Setting       | Study duration | Study outcomes                                       | Quality assessment score |
|-----------------------------------------|-----------------|----------------------------------------------|-------------|--------------------------|---------------|----------------|------------------------------------------------------|--------------------------|
| Guidi <i>et al.</i> : 2015 (CA)         | CD or UC cohort | INF: NR                                      | 102         | Prospective cohort study | NR            | NR             | Efficacy                                             | 6 <sup>a</sup>           |
| Hamalainen <i>et al.</i> : 2013         | CD or UC cohort | INF: i.v. 5 mg/kg w 0: 2: 6: and every 8 wks | 37          | Prospective cohort study | Single center | NR             | Pharmacokinetics & immunogenicity                    | 16 <sup>c</sup>          |
| Kong <i>et al.</i> : 2011 (CA)          | CD or UC cohort | INF: NR                                      | 30          | Prospective cohort study | Single center | NR             | Efficacy & immunogenicity                            | 6 <sup>a</sup>           |
| Leclerc <i>et al.</i> : 2014 (CA)       | CD or UC cohort | INF: NR                                      | 93          | Prospective cohort study | NR            | NR             | Efficacy: pharmacokinetics: & immunogenicity         | 2 <sup>a</sup>           |
| Lowenberg <i>et al.</i> : 2014 (CA)     | CD or UC cohort | INF: NR                                      | 81          | Prospective cohort study | NR            | NR             | Efficacy: HRQoL: & immunogenicity                    | 3 <sup>a</sup>           |
| Malickova <i>et al.</i> : 2013          | CD or UC cohort | INF: i.v. 5 mg/kg w 0: 2: 6: and every 8 wks | 30          | Prospective cohort study | NR            | 14 weeks       | Biomarkers                                           | 10 <sup>c</sup>          |
| Martin Arranz <i>et al.</i> : 2014 (CA) | CD or UC cohort | INF: NR                                      | 126         | Prospective cohort study | Single center | NR             | Safety: efficacy: & immunogenicity                   | 8 <sup>a</sup>           |
| Pallagi-Kunstár <i>et al.</i> : 2014    | CD or UC cohort | INF: NR                                      | 67          | Prospective cohort study | Single center | NR             | Safety: efficacy: pharmacokinetics: & immunogenicity | 14 <sup>c</sup>          |

| <b>Author</b>                       | <b>Disease</b>  | <b>Posology</b>                                         | <b>Sample size</b> | <b>Study design</b>      | <b>Setting</b> | <b>Study duration</b> | <b>Study outcomes</b>                              | <b>Quality assessment score</b> |
|-------------------------------------|-----------------|---------------------------------------------------------|--------------------|--------------------------|----------------|-----------------------|----------------------------------------------------|---------------------------------|
| Paul <i>et al.</i> : 2013           | CD or UC cohort | INF: i.v. 5 mg/kg every 8 wks then 10 mg/kg every 8 wks | 52                 | Prospective cohort study | Single center  | NR                    | Efficacy: concomitant medication; & immunogenicity | 17 <sup>c</sup>                 |
| Rivera <i>et al.</i> : 2014 (CA)    | CD or UC cohort | INF: NR                                                 | 69                 | Prospective cohort study | NR             | NR                    | Pharmacokinetics & immunogenicity                  | 7 <sup>a</sup>                  |
| Rosenthal <i>et al.</i> : 2012 (CA) | CD or UC cohort | INF: NR                                                 | 38                 | Prospective cohort study | NR             | NR                    | Pharmacokinetics & immunogenicity                  | 5 <sup>a</sup>                  |
| Schatz <i>et al.</i> : 2011 (CA)    | CD or UC cohort | INF: NR                                                 | 50                 | Prospective cohort study | Single center  | NR                    | Efficacy & immunogenicity                          | 7 <sup>a</sup>                  |
| Ungar <i>et al.</i> : 2014          | CD or UC cohort | INF: i.v. 5 mg/kg every 8 wks                           | 182                | Prospective cohort study | Single center  | 208 weeks             | Efficacy: pharmacokinetics: & immunogenicity       | 16 <sup>c</sup>                 |
| Ward <i>et al.</i> : 2015a (CA)     | CD or UC cohort | INF: NR                                                 | 79                 | Prospective cohort study | NR             | NR                    | Immunogenicity                                     | 5 <sup>a</sup>                  |
| Wolf <i>et al.</i> : 2013 (CA)      | CD or UC cohort | INF: NR                                                 | 174                | Prospective cohort study | Multicenter    | NR                    | Efficacy & immunogenicity                          | 6 <sup>a</sup>                  |
| Ben-Horin <i>et al.</i> : 2015      | CD or UC cohort | INF: NR                                                 | 86                 | Prospective cohort study | Single center  | NR                    | Pharmacokinetics                                   | 15 <sup>c</sup>                 |

| <b>Author</b>                      | <b>Disease</b>  | <b>Posology</b>                                    | <b>Sample size</b> | <b>Study design</b>             | <b>Setting</b> | <b>Study duration</b> | <b>Study outcomes</b>                        | <b>Quality assessment score</b> |
|------------------------------------|-----------------|----------------------------------------------------|--------------------|---------------------------------|----------------|-----------------------|----------------------------------------------|---------------------------------|
| Geethan <i>et al.</i> : 2014 (CA)  | CD or UC cohort | INF: NR                                            | 38                 | Prospective cohort study        | NR             | NR                    | Efficacy & immunogenicity                    | 7 <sup>a</sup>                  |
| Hoekman <i>et al.</i> : 2015       | CD or UC cohort | INF: i.v.: 5 mg/kg; w 0: 2; 6; and the every 8 wks | 39                 | Prospective cohort study        | Multicenter    | NR                    | Safety & efficacy                            | 17 <sup>c</sup>                 |
| Singh <i>et al.</i> : 2014         | CD or UC cohort | INF: i.v.: 5 mg/kg w 0: 2; and 6                   | 58                 | Prospective cohort study        | Multicenter    | 54 weeks              | Efficacy & pharmacokinetics                  | 18 <sup>c</sup>                 |
| Warman <i>et al.</i> : 2015        | CD or UC cohort | INF: i.v.: 5 mg/kg every 8 wks                     | 113                | Prospective cohort study        | Single center  | NR                    | Efficacy                                     | 16 <sup>c</sup>                 |
| Zitomersky <i>et al.</i> : 2015    | CD or UC cohort | INF: NR                                            | 134                | Prospective cohort study        | Single center  | NR                    | Efficacy: pharmacokinetics: & immunogenicity | 16 <sup>c</sup>                 |
| Ben-Horin <i>et al.</i> : 2010     | CD or UC cohort | INF: i.v. 5 mg/kg every 8 wks                      | 62                 | Prospective observational study | Single center  | NR                    | Efficacy & immunogenicity                    | 14 <sup>c</sup>                 |
| Billiet <i>et al.</i> : 2015 (CA)  | CD or UC cohort | INF: NR                                            | 201                | Retrospective cohort study      | NR             | NR                    | Efficacy                                     | 6 <sup>a</sup>                  |
| Brandse <i>et al.</i> : 2015b (CA) | CD or UC cohort | INF: NR                                            | 324                | Retrospective cohort study      | Single center  | NR                    | Immunogenicity                               | 7 <sup>a</sup>                  |

| <b>Author</b>                                                       | <b>Disease</b>  | <b>Posology</b>                                                 | <b>Sample size</b> | <b>Study design</b>        | <b>Setting</b> | <b>Study duration</b> | <b>Study outcomes</b>                          | <b>Quality assessment score</b> |
|---------------------------------------------------------------------|-----------------|-----------------------------------------------------------------|--------------------|----------------------------|----------------|-----------------------|------------------------------------------------|---------------------------------|
| Cleynen <i>et al.</i> : 2015 (CA)                                   | CD or UC cohort | INF: NR                                                         | 604                | Retrospective cohort study | NR             | NR                    | Safety and immunogenicity                      | 6 <sup>a</sup>                  |
| Dauer <i>et al.</i> : 2013 (CA)                                     | CD or UC cohort | INF: NR                                                         | 17                 | Retrospective cohort study | Single center  | NR                    | Safety & immunogenicity                        | 5 <sup>a</sup>                  |
| Marits <i>et al.</i> : 2014                                         | CD or UC cohort | INF: NR                                                         | 79                 | Retrospective cohort study | NR             | NR                    | Pharmacokinetics & immunogenicity              | 14 <sup>c</sup>                 |
| Pariante <i>et al.</i> : 2012                                       | CD or UC cohort | INF: i.v. 5 or 10 mg/kg NR                                      | 76                 | Retrospective cohort study | Multicenter    | NR                    | Safety: efficacy: & immunogenicity             | 22 <sup>c</sup>                 |
| Steenholdt <i>et al.</i> : 2011<br>Steenholdt <i>et al.</i> : 2012b | CD or UC cohort | INF: NR                                                         | 106                | Retrospective cohort study | Single center  | NR                    | Pharmacokinetics & immunogenicity              | 19 <sup>c</sup>                 |
| Vande Casteele <i>et al.</i> : 2012b (CA)                           | CD or UC cohort | INF: NR                                                         | 57                 | Retrospective cohort study | NR             | NR                    | Immunogenicity                                 |                                 |
| Vande Casteele <i>et al.</i> : 2013                                 | CD or UC        | INF: i.v. 3 mg/kg w 0: 2: 6: and then 4 infusions within 24 wks | 90                 | Retrospective cohort study | Single center  | NR                    | Efficacy: pharmacokinetics: discontinuation: & | 12 <sup>c</sup>                 |

| Author                                   | Disease         | Posology                                                           | Sample size | Study design                     | Setting       | Study duration | Study outcomes                                                 | Quality assessment score |
|------------------------------------------|-----------------|--------------------------------------------------------------------|-------------|----------------------------------|---------------|----------------|----------------------------------------------------------------|--------------------------|
|                                          | cohort          |                                                                    |             |                                  |               |                | immunogenicity                                                 |                          |
| Yanai <i>et al.</i> : 2012 (CA)          | CD or UC cohort | INF: NR                                                            | 104         | Retrospective cohort study       | Single center | >52 weeks      | Efficacy: pharmacokinetics: & immunogenicity                   | 4 <sup>a</sup>           |
| Baert <i>et al.</i> : 2014               | CD or UC cohort | Treatment holiday then INF: i.v.: 5 mg/kg: w 0: 2: and 6 or at w 0 | 128         | Retrospective cohort study       | Single center | 14 weeks       | Efficacy: pharmacokinetics: & immunogenicity                   | 17 <sup>c</sup>          |
| Buurman <i>et al.</i> : 2015             | CD or UC cohort | INF: i.v.: 5 mg/kg: w 0: 2: and 6 then every 8 wks                 | 42          | Retrospective cohort study       | Single center | 54 weeks       | Efficacy & immunogenicity                                      | 16 <sup>c</sup>          |
| Ungar <i>et al.</i> : 2015               | CD or UC cohort | INF: NR                                                            | 174         | Retrospective cohort study       | Single center | NR             | Safety: efficacy: & immunogenicity                             | 16 <sup>c</sup>          |
| Vande Castele <i>et al.</i> : 2012c (CA) | CD or UC cohort | INF: NR                                                            | 52          | Retrospective case-control study | NR            | NR             | Safety: efficacy: discontinuation: & immunogenicity            | 6 <sup>a</sup>           |
| Afif <i>et al.</i> : 2010                | CD or UC cohort | INF: NR                                                            | 155         | Retrospective chart review       | Single center | NR             | Safety: clinical response: treatment change: & discontinuation | 14 <sup>c</sup>          |
| Bar-yoseph <i>et al.</i> : 2013 (CA)     | CD or UC cohort | INF: NR                                                            | 36          | Retrospective chart review       | NR            | NR             | pharmacokinetics & immunogenicity                              | 5 <sup>a</sup>           |
| Chauhan <i>et al.</i> :                  | CD or           | INF: NR                                                            | 36          | Retrospective                    | NR            | NR             | Pharmacokinetics &                                             | 5 <sup>a</sup>           |



| Author                           | Disease            | Posology                                                         | Sample size | Study design               | Setting                   | Study duration | Study outcomes                     | Quality assessment score |
|----------------------------------|--------------------|------------------------------------------------------------------|-------------|----------------------------|---------------------------|----------------|------------------------------------|--------------------------|
| 2013 (CA)                        | UC cohort          |                                                                  |             | chart review               |                           |                | immunogenicity                     |                          |
| Miele <i>et al.</i> : 2004       | CD or UC cohort    | INF: i.v. 5 or 10 mg/kg NR                                       | 132         | Retrospective chart review | NR                        | NR             | Safety & immunogenicity            | 18 <sup>c</sup>          |
| Vahabnezhad <i>et al.</i> : 2014 | CD or UC cohort    | INF: i.v. 5 mg/kg every 7 or 8 wks: then 10 mg/kg or every 6 wks | 259         | Retrospective chart review | Single center             | NR             | Safety: efficacy: & immunogenicity | 17 <sup>c</sup>          |
| Wilson <i>et al.</i> : 2013 (CA) | CD or UC cohort    | INF: NR                                                          | 160         | Retrospective chart review | Single center             | NR             | Immunogenicity                     | 1 <sup>a</sup>           |
| Garces <i>et al.</i> : 2013 (CA) | RA: PsA: AS: & IBD | INF: i.v. 3–5 mg/kg every 6 or 8 wks                             | 84          | Prospective cohort study   | Single center             | >104 weeks     | Safety & immunogenicity            | 6 <sup>a</sup>           |
| Sandborn <i>et al.</i> : 2012a   | CD                 | UST: i.v. 1: 3: or 4 mg/kg w 0 and sc 90 mg w 8 and 16           | 526         | RCT                        | Multicenter International | 36 weeks       | Safety: efficacy: & immunogenicity | 4 <sup>b</sup>           |
| Sandborn <i>et al.</i> : 2013    | CD                 | VDM: i.v.: 300 mg: w 0 and 2: then every 2 or 4 wks              | 1115        | RCT                        | Multicenter International | 52 weeks       | Safety and efficacy                | 5 <sup>b</sup>           |
| Sands <i>et al.</i> : 2014       | CD                 | VDM: i.v.: 300 mg: w 0: 2: and 6                                 | 207         | RCT                        | Multicenter International | 10 weeks       | Safety and efficacy                | 5 <sup>b</sup>           |

| Author                                                                    | Disease         | Posology                                            | Sample size | Study design               | Setting                   | Study duration | Study outcomes                                         | Quality assessment score |
|---------------------------------------------------------------------------|-----------------|-----------------------------------------------------|-------------|----------------------------|---------------------------|----------------|--------------------------------------------------------|--------------------------|
| Feagan <i>et al.</i> : 2013                                               | UC              | VDM: i.v.: 300 mg: w 0 and 2: then every 2 or 4 wks | 895         | RCT                        | Multicenter International | 52 weeks       | Safety and efficacy                                    | 5 <sup>b</sup>           |
| Parikh <i>et al.</i> : 2013                                               | CD or UC cohort | VDM: i.v.: 2 or 6 mg/kg every 8 wks                 | 72          | LTE (Phase II)             | Multicenter International | 78 weeks       | Safety: efficacy: pharmacokinetics: and immunogenicity | 16 <sup>c</sup>          |
| Yanai <i>et al.</i> : 2015                                                | CD or UC cohort | ADA: NR<br>INF: NR                                  | 247         | Retrospective cohort study | Multicenter               | NR             | Efficacy                                               | 18 <sup>c</sup>          |
| Frederiksen <i>et al.</i> : 2014 (CA)<br>Frederiksen <i>et al.</i> : 2014 | CD or UC cohort | ADA: NR<br>INF: NR                                  | 482         | Retrospective cohort study | Single center             | NR             | Pharmacokinetics & immunogenicity                      | 18 <sup>c</sup>          |
| van Schaik <i>et al.</i> : 2014 (CA)                                      | CD or UC cohort | ADA: NR<br>INF: NR                                  | 217         | Retrospective cohort study | Single center             | NR             | Immunogenicity                                         | 6 <sup>a</sup>           |
| Szepes <i>et al.</i> : 2013 (CA)                                          | PsO & IBD       | ADA: NR<br>INF: NR                                  | 99          | Prospective cohort study   | NR                        | NR             | Safety: efficacy: & immunogenicity                     | 2 <sup>a</sup>           |

<sup>a</sup>Quality scoring of randomized and non-randomized studies from conference proceedings based on the modified Downs and Black checklist.

<sup>b</sup>Quality scoring of RCTs based on the Jadad score.

<sup>c</sup>Quality scoring of non-randomized studies based on the Downs and Black checklist.

(CA): conference abstract; 6-MP: mercaptopurine; ABA: abatacept; ADA: adalimumab; AS: ankylosing spondylitis; AZA: azathioprine; CD: Crohn's disease; CZP: certolizumab pegol; eow: every other week; GLM: golimumab; i.v.: intravenous; IBD: inflammatory bowel disease; INF: infliximab; IS: immunosuppressants; LTE: long-term extension; MTX: methotrexate; N/A: not applicable; NR: not reported; nRCT: non-randomized clinical trial; PsA: psoriatic arthritis; PsO: psoriasis; RA: rheumatic arthritis; RCT: randomized clinical trial sc: subcutaneous; UC: ulcerative colitis; VDM: vedolizumab; UST: ustekinumab; w: week; wks: weeks.

**Supplementary Table 5.** Studies excluded due to low-quality assessment scores.

|                                                                                                                                                                                                                                                                                      |
|--------------------------------------------------------------------------------------------------------------------------------------------------------------------------------------------------------------------------------------------------------------------------------------|
| <b>Full-text observational study excluded for scoring <math>\leq 10</math> points on the Downs and Black tool</b>                                                                                                                                                                    |
| Malickova K: Duricova D: Bortlik M: Janatkova I: Zima T: Lukas M. Phosphatidylserine-dependent anti-prothrombin antibodies (aPS/PT) in infliximab-treated patients with inflammatory bowel diseases. <i>Autoimmunity Highlights</i> 2013;4:27–32.<br><br>Score = 10                  |
| <b>Abstracts excluded for scoring <math>\leq 2</math> points on the modified Downs and Black tool</b>                                                                                                                                                                                |
| Leclerc M: Marotte H: Paul S: <i>et al.</i> Persistence of antibodies to infliximab for more than two months strongly predicts loss of response to infliximab in inflammatory bowel diseases. <i>J Crohns Colitis</i> 2014;8:S226–S227.<br><br>Score = 2                             |
| Szepes Z: Kunstar E: Farkas K: <i>et al.</i> Clinical utility of measuring serum TNF alpha level: anti TNF alpha levels and antibody titers in critical situations in inflammatory bowel disease and in psoriasis. <i>J Crohns Colitis</i> 2013;7:S118–S119.<br><br>Score = 2        |
| Velayos FS: Sheibani S: Lockton S: <i>et al.</i> Prevalence of antibodies to adalimumab (ATA) and correlation between ATA and low serum drug concentration on CRP and clinical symptoms in a prospective sample of IBD patients. <i>Gastroenterol</i> 2013;144:S91.<br><br>Score = 1 |
| Wilson C: Huffman S: McGoogan K. Common factors among children who developed antibodies to infliximab. <i>Inflamm Bowel Dis</i> 2013;19:S98.<br><br>Score = 1                                                                                                                        |

**Supplementary Table 6.** Factors influencing the formation and detection of ADAbs.<sup>1-3</sup>

|                                                                                                                                                                                                                                       |
|---------------------------------------------------------------------------------------------------------------------------------------------------------------------------------------------------------------------------------------|
| <p><b>Treatment-related factors influencing the formation of ADAbs</b></p> <p>Structure of biologic agent</p> <p>Treatment duration</p> <p>Route of administration</p> <p>Concomitant medications (e.g. immunosuppressive agents)</p> |
| <p><b>Patient-related factors influencing the formation of ADAbs</b></p> <p>Age, gender</p> <p>Disease status</p> <p>Genetic factors</p> <p>Prior exposure to biologics</p> <p>Immunocompetence</p>                                   |
| <p><b>Factors influencing the detection of ADAbs</b></p> <p>Assay technique</p> <p>Timing of sampling relative to drug exposure</p>                                                                                                   |

ADAbs: anti-drug antibodies.

**Supplementary Table 7.** ADABs to infliximab and study outcomes.

| <b>Dichotomous efficacy outcomes</b>          |                |                                                           |                                 |                                                             |                                                                    |                       |
|-----------------------------------------------|----------------|-----------------------------------------------------------|---------------------------------|-------------------------------------------------------------|--------------------------------------------------------------------|-----------------------|
| <b>Author</b>                                 | <b>Disease</b> | <b>Study design<br/>(number of patients<br/>assessed)</b> | <b>Study outcomes</b>           | <b>Patients with<br/>ADABs<sup>a</sup><br/><i>n</i> (%)</b> | <b>Patients<br/>without<br/>ADABs<sup>b</sup><br/><i>n</i> (%)</b> | <b><i>p</i> value</b> |
| Hanauer <i>et al.</i> ,<br>2004 <sup>4</sup>  | CD             | RCT (514)                                                 | Episodic: 54 wks:               |                                                             |                                                                    |                       |
|                                               |                |                                                           | CDAI improvement                | 6 (67)                                                      | 25 (59)                                                            | -                     |
|                                               |                |                                                           | CDAI remission                  | 3 (33)                                                      | 16 (36)                                                            | -                     |
| Sands <i>et al.</i> , 2004 <sup>5</sup>       | CD             | RCT (258)                                                 | CDAI responders                 | 14 (32)                                                     | 25 (31)                                                            | -                     |
| Colombel <i>et al.</i> ,<br>2010 <sup>6</sup> | CD             | RCT & LTE (219)                                           | Steroid-free remission (26 wks) | 9 (56.3)                                                    | 12 (66.7)                                                          | -                     |
|                                               |                |                                                           | Steroid-free remission (50 wks) | 8 (57.1)                                                    | 12 (70.6)                                                          | -                     |
| Farrell <i>et al.</i> ,                       | CD             | Prospective cohort                                        | Continuous responders           | 0 (0)                                                       | 21 (61.8)                                                          | -                     |

|                                                         |    |                                     |                                       |           |           |            |
|---------------------------------------------------------|----|-------------------------------------|---------------------------------------|-----------|-----------|------------|
| 2003 <sup>7</sup>                                       |    | study (53)                          | Past responders                       | 11 (57.9) | 4 (11.8)  | -          |
|                                                         |    |                                     | Partial responders                    | 2 (10.5)  | 6 (17.6)  | -          |
|                                                         |    |                                     | Non-responders                        | 6 (31.6)  | 3 (8.8)   | -          |
| Maser <i>et al.</i> ,<br>2006 <sup>8</sup>              | CD | Prospective cohort<br>study (105)   | Endoscopic improvement                | NR (25)   | NR (7)    | $p = 0.43$ |
|                                                         |    |                                     | ADAbs status and undetectable<br>IFX: | NR (66)   | NR (67)   | $p = 0.62$ |
|                                                         |    |                                     | HBI remission                         |           |           |            |
| Church <i>et al.</i> ,<br>2014 <sup>9</sup>             | CD | Retrospective chart<br>review (195) | Secondary non-responders              | 15 (88.2) | NR        | -          |
|                                                         |    |                                     | Partial non-responders                | 2 (11.8)  | NR        | -          |
| Hukkinen <i>et al.</i> ,<br>2014 <sup>10</sup>          | CD | Retrospective cohort<br>study (13)  | Responders                            | 2 (50)    | NR        | -          |
| Rutgeerts <i>et al.</i> ,<br>2005 <sup>11</sup> (ACT I) | UC | RCT (229)                           | Mayo responders                       | 3 (21.4)  | 3 (8.3)   | -          |
| Rutgeerts <i>et al.</i> ,                               | UC | RCT (188)                           | Mayo responders                       | 11 (57.9) | 45 (57.0) | -          |

|                                                    |                 |                                |                                                                    |                              |                             |                                        |
|----------------------------------------------------|-----------------|--------------------------------|--------------------------------------------------------------------|------------------------------|-----------------------------|----------------------------------------|
| 2005 <sup>11</sup> (ACT II)                        |                 |                                |                                                                    |                              |                             |                                        |
| Brandse <i>et al.</i> , 2015 <sup>12</sup> (CA)    | UC              | Prospective cohort study (20)  | Mayo responders                                                    | 1 (14.3)                     | 10 (50)                     |                                        |
| Seow <i>et al.</i> , 2010 <sup>13</sup>            | UC              | Prospective cohort study (108) | Mayo responders<br>Endoscopic improvement<br>Colectomy             | 6 (14)<br>11 (25)<br>23 (52) | 4 (18)<br>8 (35)<br>13 (59) | $p = 0.95$<br>$p = 0.61$<br>$p = 0.78$ |
| Hamalainen <i>et al.</i> , 2013 <sup>14</sup>      | CD or UC cohort | Prospective cohort study (28)  | IFX poor responders<br>IFX loss of response<br>IFX good responders | 1 (20)<br>2 (40)<br>1 (20)   | NR<br>NR<br>NR              | -<br>-<br>-                            |
| Kong <i>et al.</i> , 2011 <sup>15</sup> (CA)       | CD or UC cohort | Prospective cohort study (30)  | Responders<br>Partial/non-responders                               | 2 (33.3)<br>4 (66.7)         | NR<br>NR                    | -<br>-                                 |
| Pallagi-Kunstar <i>et al.</i> , 2014 <sup>16</sup> | CD or UC cohort | Prospective cohort study (67)  | Loss of response                                                   | 5 (35.7)                     | NR                          | -                                      |



|                                                      |                       |                                   |                                                                                                                                                                 |                                          |                                                  |                  |
|------------------------------------------------------|-----------------------|-----------------------------------|-----------------------------------------------------------------------------------------------------------------------------------------------------------------|------------------------------------------|--------------------------------------------------|------------------|
| Rosenthal <i>et al.</i> ,<br>2012 <sup>17</sup> (CA) | CD or<br>UC<br>cohort | Prospective cohort<br>study (38)  | ADAbs prevalence (non-resp.)<br>ADAbs prevalence (resp.: 14<br>wks)<br>ADAbs prevalence (resp.: 54<br>wks)                                                      | 2 (50)<br>3 (8.8)<br>7 (20.6)            | NR<br>NR<br>NR                                   | -<br>-<br>-      |
| Ungar <i>et al.</i> ,<br>2014 <sup>18</sup>          | CD or<br>UC<br>cohort | Prospective cohort<br>study (125) | Resp. (52 wks: high ADAbs<br>titers)<br>Resp. (104 wks: high ADAbs<br>titers)<br>Resp. (156 wks: high ADAbs<br>titers)<br>Resp. (204 wks: high ADAbs<br>titers) | NR (40.2)<br>NR (30.2)<br>NR (23.1)<br>- | NR (67.5)<br>NR (67.5)<br>NR (67.5)<br>NR (67.5) | -<br>-<br>-<br>- |
| Hoekman <i>et al.</i> ,<br>2015 <sup>19</sup>        | CD or<br>UC<br>cohort | Prospective cohort<br>study (39)  | Clinical remission                                                                                                                                              | 2 (50)                                   | NR                                               | -                |

|                                                   |                       |                                    |                                             |           |         |             |
|---------------------------------------------------|-----------------------|------------------------------------|---------------------------------------------|-----------|---------|-------------|
| Schatz <i>et al.</i> ,<br>2011 <sup>20</sup> (CA) | CD or<br>UC<br>cohort | Retrospective cohort<br>study (50) | Loss of response                            | 10 (52.6) | 6 (NR)  | -           |
| Pariante <i>et al.</i> ,<br>2012 <sup>21</sup>    | CD or<br>UC<br>cohort | Retrospective cohort<br>study (76) | HBI/SCCAI responders to dose<br>escalation  | 6 (60)    | 21 (72) | -           |
| Vande Casteele <i>et al.</i> , 2013 <sup>22</sup> | CD or<br>UC<br>cohort | Retrospective cohort<br>study (90) | Loss of response                            |           |         |             |
|                                                   |                       |                                    | Loss of response (persistent)               | 43 (81)   | 17 (50) | -           |
|                                                   |                       |                                    | Loss of response (transient)                | 30 (78)   | 17 (50) | $p = 0.004$ |
|                                                   |                       |                                    | Loss of response & IFX plus IS              | 13 (87)   | 17 (50) | $p = 0.012$ |
|                                                   |                       |                                    | Loss of response & IFX plus IS<br>(persis.) | 12 (28)   | 6 (35)  | -           |
|                                                   |                       |                                    | Loss of response & IFX plus IS<br>(trans.)  | 10 (26)   | 6 (35)  | NS          |
|                                                   |                       |                                    | Loss of response & IFX plus IS<br>(trans.)  | 2 (13)    | 6 (35)  | NS          |
| Yanai <i>et al.</i> ,                             | CD or                 | Retrospective cohort               | Remission                                   | 3 (50)    | NR      | -           |

|                                                |                 |                                                   |                                                                                                                                                          |                                        |                                           |                       |
|------------------------------------------------|-----------------|---------------------------------------------------|----------------------------------------------------------------------------------------------------------------------------------------------------------|----------------------------------------|-------------------------------------------|-----------------------|
| 2014 <sup>23</sup> (CA)                        | UC cohort       | study (NR)                                        |                                                                                                                                                          |                                        |                                           |                       |
| Vahabnezhad <i>et al.</i> , 2014 <sup>24</sup> | CD or UC cohort | Retrospective chart review (40)                   | Recaptured responders:<br>ADAbs prevalence (CD)<br>ADAbs prevalence (UC)<br>Non-recaptured responders:<br>ADAbs prevalence (CD)<br>ADAbs prevalence (UC) | 5 (22)<br>0 (0)<br>11 (73)<br>1 (50)   | NR<br>NR<br>NR<br>NR                      | -<br>-<br>-<br>-      |
| <b>Continuous efficacy outcomes</b>            |                 |                                                   |                                                                                                                                                          |                                        |                                           |                       |
| <b>Author</b>                                  | <b>Disease</b>  | <b>Study design (number of patients assessed)</b> | <b>Study outcomes</b>                                                                                                                                    | <b>Patients with ADAbs</b><br><i>n</i> | <b>Patients without ADAbs</b><br><i>n</i> | <b><i>p</i> value</b> |

|                                            |                 |                                                       |                               |                                             |                                                |                       |
|--------------------------------------------|-----------------|-------------------------------------------------------|-------------------------------|---------------------------------------------|------------------------------------------------|-----------------------|
| Imaeda <i>et al.</i> , 2012 <sup>25</sup>  | CD              | Prospective cohort study (58)                         | CDAI score                    | 206                                         | 94                                             | $p < 0.001$           |
| Bortlik <i>et al.</i> , 2013 <sup>26</sup> | CD              | Retrospective cohort study (84)                       | Treatment failure: HR         | 4.34                                        | 0.39                                           | -                     |
| Ungar <i>et al.</i> , 2014 <sup>18</sup>   | CD or UC cohort | Prospective cohort study (125)                        | ADAbs and loss of response: r | 0.62                                        | -                                              | $p < 0.001$           |
| <b>Discontinuation of therapy</b>          |                 |                                                       |                               |                                             |                                                |                       |
| <b>Author</b>                              | <b>Disease</b>  | <b>Study design<br/>(number of patients assessed)</b> | <b>Study outcomes</b>         | <b>Patients with ADAbs<br/><i>n</i> (%)</b> | <b>Patients without ADAbs<br/><i>n</i> (%)</b> | <b><i>p</i> value</b> |
| Hanauer <i>et al.</i> , 2004 <sup>4</sup>  | CD              | RCT (514)                                             | Discontinuation               | 5 (6)                                       | 7 (2)                                          | -                     |
| Maser <i>et al.</i> ,                      | CD              | Prospective cohort                                    | Discontinuation               | 4 (18.2)                                    | 10 (38.5)                                      | -                     |

|                                                        |                 |                                       |                                                                                                                        |                          |               |                        |
|--------------------------------------------------------|-----------------|---------------------------------------|------------------------------------------------------------------------------------------------------------------------|--------------------------|---------------|------------------------|
| 2006 <sup>8</sup>                                      |                 | study (105)                           |                                                                                                                        |                          |               |                        |
| Hayes <i>et al.</i> , 2014 <sup>27</sup>               | UC              | Retrospective chart review (37)       | Discontinuation                                                                                                        | 6 (100)                  | NR            | -                      |
| Hamalainen <i>et al.</i> , 2013 <sup>14</sup>          | CD or UC cohort | Prospective cohort study (28)         | Discontinuation                                                                                                        | 1 (20)                   | NR            | -                      |
| Vande Casteele <i>et al.</i> , 2013 <sup>22</sup>      | CD or UC cohort | Retrospective cohort study (90)       | Discontinuation:<br>Sust. loss of resp/hypersensitivity<br>Trans loss of resp/hypersensitivity<br>Sust. vs. Trans.: RR | 26 (68)<br>2 (13)<br>5.1 | NR<br>NR<br>- | -<br>-<br>$p = 0.0005$ |
| Vande Castelle <i>et al.</i> , 2012 <sup>28</sup> (CA) | CD or UC cohort | Retrospective case-control study (52) | Discontinuation (sust.)<br>Discontinuation (trans.)                                                                    | 5 (14)<br>10 (68)        | -<br>-        | -<br>-                 |
| Afif <i>et al.</i> , 2010 <sup>29</sup>                | CD or UC cohort | Retrospective chart review (149)      | Discontinuation                                                                                                        | 6 (17)                   | NR            | -                      |

<sup>a</sup>For dichotomous outcomes, the number and percentage of ADAbs-positive patients are shown as a proportion of the total number of patients with ADAbs-positive findings.

<sup>b</sup>The number and percentage of ADAbs-negative patients are shown as a proportion of the total number of patients with ADAbs-negative findings.

ADAbs: anti-drug antibodies; CA: conference abstract; CD: Crohn's disease; CDAI: CD activity index; HR: hazard ratio; IFX: infliximab; IS: immunosuppressant; LTE: long-term extension; N: number of patients; NR: not reported; persis.: persistent resp; r: correlation coefficient; RCT: randomized controlled trial; resp: response; RR: relative risk; sust: sustained; trans: transient; UC: ulcerative colitis; wks: weeks.

**Supplementary Table 8.** ADAbs to adalimumab and study outcomes.

| <b>Dichotomous efficacy outcomes</b>                   |                |                                                           |                            |                                                             |                                                                    |                       |
|--------------------------------------------------------|----------------|-----------------------------------------------------------|----------------------------|-------------------------------------------------------------|--------------------------------------------------------------------|-----------------------|
| <b>Author</b>                                          | <b>Disease</b> | <b>Study design<br/>(number of patients<br/>assessed)</b> | <b>Study outcomes</b>      | <b>Patients with<br/>ADAbs<sup>a</sup><br/><i>n</i> (%)</b> | <b>Patients<br/>without<br/>ADAbs<sup>b</sup><br/><i>n</i> (%)</b> | <b><i>p</i> value</b> |
| Eckert <i>et al.</i> , 2013 <sup>30</sup>              | CD             | RCT (182)                                                 | Resp. or Remission (Wk 26) | 2 (33.3)                                                    | NR                                                                 | -                     |
|                                                        |                |                                                           | Remission (Wk 52)          | 1 (16.7)                                                    | NR                                                                 | -                     |
| Sandborn <i>et al.</i> ,<br>2007 <sup>31</sup>         | CD             | RCT (269)                                                 | CDAI remission (24 wks)    | 3 (43)                                                      | NR                                                                 | -                     |
|                                                        |                |                                                           | CDAI remission (56 wks)    | 2 (29)                                                      | NR                                                                 | -                     |
| Vande Casteele <i>et al.</i> , 2015 <sup>32</sup> (CA) | CD             | Prospective cohort<br>study (23)                          | Clinical remission         | 1 (100)                                                     | NR                                                                 | -                     |

|                                                |                 |                                                   |                                   |                                         |                                            |                       |
|------------------------------------------------|-----------------|---------------------------------------------------|-----------------------------------|-----------------------------------------|--------------------------------------------|-----------------------|
| West <i>et al.</i> , 2008 <sup>33</sup>        | CD              | Retrospective cohort study (25)                   | Responders                        | 1 (20.0)                                | NR (90.0)                                  | -                     |
| Roblin <i>et al.</i> , 2014 <sup>34</sup>      | CD or UC cohort | Single-arm study (40)                             | Mucosal healing<br>CDAI remission | 1 (11.1)<br>1 (11.1)                    | NR<br>NR                                   | -<br>-                |
| <b>Continuous efficacy outcomes</b>            |                 |                                                   |                                   |                                         |                                            |                       |
| <b>Author</b>                                  | <b>Disease</b>  | <b>Study design (number of patients assessed)</b> | <b>Study outcomes</b>             | <b>Patients with ADAbs<br/><i>n</i></b> | <b>Patients without ADAbs<br/><i>n</i></b> | <b><i>p</i> value</b> |
| Bodini <i>et al.</i> , 2014 <sup>35</sup> (CA) | CD              | Prospective cohort study (23)                     | HBI: score                        | 10                                      | 5                                          | $p < 0.0001$          |
| Zittan <i>et al.</i> , 2015 <sup>36</sup> (CA) | CD              | Prospective cohort study (91)                     | CRP: mg/dL                        | 7.9                                     | 13.4                                       | -                     |



|                                                                                                                   |                    |                                                           |                       |                                                 |                                                        |                       |
|-------------------------------------------------------------------------------------------------------------------|--------------------|-----------------------------------------------------------|-----------------------|-------------------------------------------------|--------------------------------------------------------|-----------------------|
| Steenholdt <i>et al.</i> ,<br>2015 <sup>37</sup> (CA)                                                             | CD or UC<br>cohort | Prospective cohort<br>study (72)                          | Loss of response: OR  | 67                                              | -                                                      | $p < 0.0001$          |
| Frederiksen <i>et al.</i> ,<br>2014a <sup>38</sup> (CA)<br><br>Frederiksen <i>et al.</i> ,<br>2014b <sup>39</sup> | CD or UC<br>cohort | Retrospective cohort<br>study (142)                       | Secondary failure: OR | 28 (3–248)                                      | -                                                      | $p < 0.001$           |
| <b>Discontinuation of therapy</b>                                                                                 |                    |                                                           |                       |                                                 |                                                        |                       |
| <b>Author</b>                                                                                                     | <b>Disease</b>     | <b>Study design<br/>(number of patients<br/>assessed)</b> | <b>Study outcomes</b> | <b>Patients with<br/>ADAbs<br/><i>n</i> (%)</b> | <b>Patients<br/>without<br/>ADAbs<br/><i>n</i> (%)</b> | <b><i>p</i> value</b> |
| Karmiris <i>et al.</i> ,<br>2009 <sup>40</sup><br><br>Baert <i>et al.</i> ,                                       | CD                 | Prospective cohort<br>study (148)                         | Discontinuation       | 10 (83.3)                                       | NR                                                     | -                     |

|                    |  |  |  |  |  |  |
|--------------------|--|--|--|--|--|--|
| 2014 <sup>41</sup> |  |  |  |  |  |  |
|--------------------|--|--|--|--|--|--|

<sup>a</sup>For dichotomous outcomes, the number and percentage of ADAbs-positive patients are shown as a proportion of the total number of patients with ADAbs-positive findings.

<sup>b</sup>The number and percentage of ADAbs-negative patients are shown as a proportion of the total number of patients with ADAbs-negative findings.

ADAbs: anti-drug antibodies; ADM: adalimumab; CA: conference abstract; CD: Crohn’s disease; CDAI: CD Activity Index; conc.: concentration; CRP: C-reactive protein; detect.: detectable; HBI: Harvey Bradshaw Index; HR: hazard ratio; IS: immunosuppressant; LTE: long-term extension; N: number of patients; NR: not reported; OR: odds ratio; persis.: persistent resp; r: correlation coefficient; RCT: randomized controlled trial; resp: response; RR: relative risk; sust: sustained; trans: transient; UC: ulcerative colitis; undetect.: undetectable; wks: weeks.

## References

1. Tovey, M.G., Legrand, J. and Lallemand, C. (2011) Overcoming immunogenicity associated with the use of biopharmaceuticals. *Expert Rev Clin Pharmacol* 4: 623-631.
2. Wang, S.L., Ohrmund, L., Hauenstein, S., Salbato, J., Reddy, R., Monk, P. *et al.* (2012) Development and validation of a homogeneous mobility shift assay for the measurement of infliximab and antibodies-to-infliximab levels in patient serum. *J Immunol Methods* 382: 177-188.
3. Bloem, K., van Leeuwen, A., Verbeek, G., Nurmohamed, M.T., Wolbink, G.J., van der Kleij, D. *et al.* (2015) Systematic comparison of drug-tolerant assays for anti-drug antibodies in a cohort of adalimumab-treated rheumatoid arthritis patients. *J Immunol Methods* 418: 29-38.
4. Hanauer, S.B., Wagner, C.L., Bala, M., Mayer, L., Travers, S., Diamond, R.H. *et al.* (2004) Incidence and importance of antibody responses to infliximab after maintenance or episodic treatment in Crohn's disease. *Clin Gastroenterol Hepatol* 2: 542-553.

5. Sands, B.E., Anderson, F.H., Bernstein, C.N., Chey, W.Y., Feagan, B.G., Fedorak, R.N. *et al.* (2004) Infliximab maintenance therapy for fistulizing Crohn's disease. *N Engl J Med* 350: 876-885.
6. Colombel, J.F., Sandborn, W.J., Reinisch, W., Mantzaris, G.J., Kornbluth, A., Rachmilewitz, D. *et al.* (2010) Infliximab, azathioprine, or combination therapy for Crohn's disease. *N Engl J Med* 362: 1383-1395.
7. Farrell, R.J., Alsahli, M., Jeen, Y.T., Falchuk, K.R., Peppercorn, M.A. and Michetti, P. (2003) Intravenous hydrocortisone premedication reduces antibodies to infliximab in Crohn's disease: a randomized controlled trial. *Gastroenterology* 124: 917-924.
8. Maser, E.A., Villela, R., Silverberg, M.S. and Greenberg, G.R. (2006) Association of trough serum infliximab to clinical outcome after scheduled maintenance treatment for Crohn's disease. *Clin Gastroenterol Hepatol* 4: 1248-1254.
9. Church, P.C., Guan, J., Walters, T.D., Frost, K., Assa, A., Muise, A.M. *et al.* (2014) Infliximab maintains durable response and facilitates catch-up growth in luminal pediatric Crohn's disease. *Inflamm Bowel Dis* 20: 1177-1186.

10. Hukkinen, M., Pakarinen, M.P., Piekkala, M., Koivusalo, A., Rintala, R. and Kolho, K.-L. (2014) Treatment of complex perianal fistulas with seton and infliximab in adolescents with Crohn's disease. *J Crohns Colitis* 8: 756-762.
11. Rutgeerts, P., Sandborn, W.J., Feagan, B.G., Reinisch, W., Olson, A., Johanns, J. *et al.* (2005) Infliximab for induction and maintenance therapy for ulcerative colitis. *N Engl J Med* 353: 2462-2476.
12. Brandse, J.F., Singh, S., Löwenberg, M., Ponsioen, C.Y., van den Brink, G.R., and D'Haens, G.R. (2015) Biomarkers predict lack of response to anti-TNF in moderate to severe ulcerative colitis. *J Crohns Colitis* 9: S241
13. Seow, C.H., Newman, A., Irwin, S.P., Steinhart, A.H., Silverberg, M.S. and Greenberg, G.R. (2010) Trough serum infliximab: a predictive factor of clinical outcome for infliximab treatment in acute ulcerative colitis. *Gut* 59: 49-54.
14. Hämäläinen, A., Sipponen, T. and Kolho, K.L. (2013) Serum infliximab concentrations in pediatric inflammatory bowel disease. *Scand J Gastroenterol* 48: 35-41.

15. Kong, J.Y., Bundell, C.S., Pawlik, J., Hollingsworth, P.N., and Forbes, G.M. (2011) Trough serum infliximab level, anti-infliximab antibody status and response to infliximab maintenance treatment in inflammatory bowel disease (IBD). *J Gastroenterol.Hepatol.* 26: 59-60
16. Pallagi-Kunstár, É., Farkas, K., Szepes, Z., Nagy, F., Szucs, M., Kui, R. *et al.* (2014) Utility of serum TNF-alpha, infliximab trough level, and antibody titers in inflammatory bowel disease. *World J Gastroenterol* 20: 5031-5035.
17. Rosenthal, C., Melmed, G., Tripuraneni, B., Gebbia, J., Callejas, S., Farrior, S., Rabizadeh, S., and Dubinsky, M. (2012) Early infliximab trough levels predict remission at one year in pediatric IBD patients. *Inflamm Bowel Dis* 18: S5
18. Ungar, B., Chowers, Y., Yavzori, M., Picard, O., Fudim, E., Har-Noy, O. *et al.* (2014) The temporal evolution of antidrug antibodies in patients with inflammatory bowel disease treated with infliximab. *Gut* 63: 1258-1264.
19. Hoekman, D.R., Brandse, J.F., de Meij, T.G., Hummel, T.Z., Löwenberg, M., Benninga, M.A. *et al.* (2015) The association of infliximab trough levels with

disease activity in pediatric inflammatory bowel disease. *Scand J Gastroenterol* 50: 1110-1117.

20. Schatz, S.B., Prell, C., Freudenberg, F., Schwerd, T., Bufler, P., and Koletzko, S. (2011) Correlation of infliximab levels and antibodies with clinical outcome in children with IBD. *J Pediatr Gastroenterol Nutr* 52: E45
21. Pariente, B., Pineton de Chambrun, G., Krzysiek, R., Desroches, M., Louis, G., De Cassan, C. *et al.* (2012) Trough levels and antibodies to infliximab may not predict response to intensification of infliximab therapy in patients with inflammatory bowel disease. *Inflamm Bowel Dis* 18: 1199-1206.
22. Vande Casteele, N., Gils, A., Singh, S., Ohrmund, L., Hauenstein, S., Rutgeerts, P. *et al.* (2013) Antibody response to infliximab and its impact on pharmacokinetics can be transient. *Am J Gastroenterol* 108: 962-971.
23. Yanai, H., Lichtenstein, L., Assa, A., Mazor, Y., Weiss, B., Levine, A., Ron, Y., Kopylov, U., Bujanover, Y., Rosenbach, Y., Ungar, B., Eliakim, A.R., Chowers, Y., Shamir, R., Fraser, G., Dotan, I., and Ben-Horin, S. (2014) Anti-TNF and anti-

drug antibodies levels predict the outcomes of interventions after loss of response to adalimumab and infliximab. *Gastroenterology* 146: S-381

24. Vahabnezhad, E., Rabizadeh, S. and Dubinsky, M.C. (2014) A 10-year, single tertiary care center experience on the durability of infliximab in pediatric inflammatory bowel disease. *Inflamm Bowel Dis* 20: 606-613.
25. Imaeda, H., Andoh, A. and Fujiyama, Y. (2012) Development of a new immunoassay for the accurate determination of anti-infliximab antibodies in inflammatory bowel disease. *J Gastroenterol* 47: 136-143.
26. Bortlik, M., Duricova, D., Malickova, K., Machkova, N., Bouzkova, E., Hrdlicka, L. *et al.* (2013) Infliximab trough levels may predict sustained response to infliximab in patients with Crohn's disease. *J Crohns Colitis* 7: 736-743.
27. Hayes, M.J., Stein, A.C. and Sakuraba, A. (2014) Comparison of efficacy, pharmacokinetics, and immunogenicity between infliximab mono- versus combination therapy in ulcerative colitis. *J Gastroenterol Hepatol* 29: 1177-1185.



28. Vande Casteele, N., Cuypers, L., Singh, S., Ohrmund, L., Hauenstein, S., van Assche, G., Rutgeerts, P.J., Gils, A., and Vermeire, S. (2012) Antibodies to infliximab can either be persistent or transient: A retrospective case-control study in IBD patients treated with infliximab maintenance therapy. *Gastroenterology* 142: S-114
29. Afif, W., Loftus Jr, E.V., Faubion, W.A., Kane, S.V., Bruining, D.H., Hanson, K.A. *et al.* (2010) Clinical utility of measuring infliximab and human anti-chimeric antibody concentrations in patients with inflammatory bowel disease. *Am J Gastroenterol* 105: 1133-1139.
30. Eckert, D., Mensing, S., Sharma, S., Thakkar, R., Robinson, A., Hyams, J., Rosh, J., Ruemmele, F.M., and Awni, W. (2013) Pharmacokinetics of adalimumab in pediatric patients with moderate to severe Crohn's disease. *J Crohns Colitis* 7: S174
31. Sandborn, W.J., Hanauer, S.B., Rutgeerts, P., Fedorak, R.N., Lukas, M., MacIntosh, D.G. *et al.* (2007) Adalimumab for maintenance treatment of Crohn's disease: results of the CLASSIC II trial. *Gut* 56: 1232-1239.

32. Vande Casteele, N., Mould, D.R., Gils, A., Tops, S., Van den Broeck, K., Ballet, V., Ferrante, M., Van Assche, G.A., Vermeire, S., and Baert, F.J. (2015) Adequate trough concentrations and sustained TNF suppression early on during induction therapy with adalimumab predict remission in anti-TNF naive crohn's disease patients. *Gastroenterology* 148: S-854-S-855
33. West, R.L., Zelinkova, Z., Wolbink, G.J., Kuipers, E.J., Stokkers, P.C. and van der Woude, C.J. (2008) Immunogenicity negatively influences the outcome of adalimumab treatment in Crohn's disease. *Aliment Pharmacol Ther* 28: 1122-1126.
34. Roblin, X., Marotte, H., Rinaudo, M., Del Tedesco, E., Moreau, A., Phelip, J.M. *et al.* (2014) Association between pharmacokinetics of adalimumab and mucosal healing in patients with inflammatory bowel diseases. *Clin Gastroenterol Hepatol* 12: 80-84.
35. Bodini, G., Savarino, V., Dulbecco, P., Baldissarro, I., and Savarion, E. (2014) The influence of anti-adalimumab antibodies on adalimumab trough levels, TNF-alpha levels and clinical outcome. *J Crohns Colitis* 8: S42

36. Zittan, E., Kabakchiev, B., Stempak, J.M., Nguyen, G.C., Croituru, K., Van Assche, G.A., Steinhart, A.H., and Silverberg, M.S. (2015) Higher adalimumab drug levels are associated with clinical and endoscopic remission in patients with crohn's disease. *Gastroenterology* 148: S-852
37. Steenholdt, C., Frederiksen, M.T., Bendtzen, K., Ainsworth, M.A., Thomsen, O.Ø., and Brynskov, J. (2015) Time course and clinical implications of development of binding and neutralizing antibodies against adalimumab in patients with inflammatory bowel disease. *J Crohns Colitis* 9: S360-S361
38. Frederiksen, M.T., Ainsworth, M.A., Brynskov, J., Thomsen, O.Ø., Bendtzen, K. and Steenholdt, C. (2014) Antibodies against infliximab are associated with increased risk of anti-adalimumab antibody development in patients with inflammatory bowel disease. *Gastroenterology* 146: S-238.
39. Frederiksen, M.T., Ainsworth, M.A., Brynskov, J., Thomsen, O.O., Bendtzen, K. and Steenholdt, C. (2014) Antibodies against infliximab are associated with de novo development of antibodies to adalimumab and therapeutic failure in infliximab-to-adalimumab switchers with IBD. *Inflamm Bowel Dis* 20: 1714-1721.

40. Karmiris, K., Paintaud, G., Noman, M., Magdelaine-Beuzelin, C., Ferrante, M., Degenne, D. *et al.* (2009) Influence of trough serum levels and immunogenicity on long-term outcome of adalimumab therapy in Crohn's disease. *Gastroenterology* 137: 1628-1640.
  
41. Baert, F., Lockton, S., Haunstein, S., Singh, S., Gils, A., and Vermeire, S. (2014) Antibodies to adalimumab predict inflammation in Crohn's patients on maintenance adalimumab therapy. *Gastroenterology* 146: S-242
